1 **Apontic regulates cell proliferation and development by activating the expression of**  
2 ***hedgehog* and *cyclin E***

3

4 **Running title: Apt regulates *hh* and *cyclin E***

5

6 Xian-Feng Wang<sup>1</sup>, Qian Cheng<sup>1</sup>, Chong-Lei Fu<sup>1</sup>, Zi-Zhang Zhou<sup>1</sup>, Susumu Hirose<sup>2</sup> and  
7 Qing-Xin Liu<sup>1\*</sup>

8 <sup>1</sup>Laboratory of Developmental Genetics, Shandong Agricultural University, Tai'an, Shandong  
9 271018, China

10 <sup>2</sup>Department of Developmental Genetics, National Institute of Genetics, Mishima, Shizuoka  
11 411-8540, Japan

12

13 \*Author for correspondence (liuqingxin@sdau.edu.cn)

14

15 **Key words: Apontic; Hedgehog; Cyclin E; cell proliferation; development**

16

17

18

19

20

21

22

23

24

25

26

27

28

29

30

31 **Summary statement**

32 We identified a novel role for Apontic as an important common regulator of the transcription  
33 of *hedgehog* and *cyclin E*. Our study provides important insights into the mechanism of organ  
34 development.

35

36

37 **ABSTRACT**

38 Hedgehog (Hh) signaling pathway and Cyclin E are key players in cell proliferation and  
39 development. Hyperactivation of *hh* and *cyclin E* has been linked to several types of cancer.  
40 However, transcriptional regulation of *hh* and *cyclin E* are not well understood. Here we show  
41 that an evolutionarily conserved transcription factor Apontic (Apt) is an activator of *hh* and  
42 *cyclin E* in *Drosophila*. Apt directly promotes the expression of *hh* and *cyclin E* through its  
43 binding site in the promoter regions of *hh* and *cyclin E* during wing development. This  
44 Apt-dependent proper expression of *hh* and *cyclin E* is required for cell proliferation and  
45 development of the wing. Apt-mediated expression of *hh* and *cyclin E* can direct proliferation  
46 of Hh-expressing cells and simultaneous growth, patterning and differentiation of  
47 Hh-recipient cells. The discovery of the coordinated expression of Hh and principal cell-cycle  
48 regulator Cyclin E by Apt implicates insight into the mechanism by which deregulated *hh* and  
49 *cyclin E* promotes tumor formation.

50

51

52

53

54

55

56

57

58

59

60

61 **INTRODUCTION**

62 Animal development requires the organ patterning and growth. How these two processes are  
63 coordinated remains unclear. The *Drosophila* wing is an excellent model to study the  
64 regulation of gene expression during the organ patterning and cell growth. The wing disc is a  
65 sac-like structure composed of disc proper (DP) cells and peripodial epithelium (PE). During  
66 larval development, wing disc DP and PE cells proliferate extensively and are patterned,  
67 finally give rise to the adult wing (Milner et al., 1984). The Hh and Cyclin E can contribute to  
68 patterning and growth of the wing disc during development (Neufeld et al., 1998; Tabata and  
69 Kornberg, 1994).

70 Hh pathway is one of the major signaling pathways that control animal development from  
71 *Drosophila* to humans, which has been implicated in stem cell maintenance, cell migration,  
72 axon guidance and tissue regeneration (Beachy et al., 2004; Charron et al., 2003; Clement et  
73 al., 2007; Hochman et al., 2006). In the *Drosophila* wing disc, Hh expresses in posterior (P)  
74 compartment cells and spreads into the anterior compartment where it activates target genes  
75 such as *engrailed (en)*, *patched (ptc)*, *collier (col)*, *decapentaplegic (dpp)* and *iroquois (iro)*  
76 (Matusek et al., 2014; Nahmad and Stathopoulos, 2009; Tabata and Kornberg, 1994) to  
77 control wing patterning. Moreover, Hh is required for transient fusion between the PE and the  
78 DP sides during regeneration of wing discs (McClure and Schubiger, 2005). Therefore, the  
79 expression of *hh* is vital in the wing disc. In the anterior (A) compartment cells, the truncated  
80 transcription repressor  $Ci^R$  inhibits the transcription of *hh*. However, the underlying  
81 mechanism by which the posterior cells activate *hh* transcription is still to be determined.

82 Cyclin E belongs to the cyclin family, which is required for cell division (Knoblich et al.,  
83 1994). Dysregulation of *cyclin E* correlates with various tumors, including breast cancer and  
84 lung cancer (Donnellan and Chetty, 1999; Keyomarsi et al., 1994; Moroy and Geisen, 2004).  
85 Besides, deregulated Cyclin E activity causes cell lineage-specific abnormalities, such as  
86 impaired maturation due to unregulated cell proliferation (Minella et al., 2008). In *Drosophila*,  
87 Cyclin E is essential for G1-to-S phase transition in the posterior cells of eye disc (Richardson  
88 et al., 1995). It has been reported that *cyclin E* is a potential target gene of Hh signaling in  
89 *Drosophila*. Hh pathway activates *cyclin E* transcription through its unique transcription

90 factor Ci in the posterior cells of eye disc (Duman-Scheel et al., 2002). It is known that Hh  
91 pathway is turned on exclusively in the A cells near A/P boundary (Strigini and Cohen, 1997;  
92 Tabata and Kornberg, 1994). However, *cyclin E* expresses throughout the wing disc (Neufeld  
93 et al., 1998). This contradiction suggests that other factors are involved in regulating the  
94 expression of *cyclin E*. Therefore, it is fruitful to investigate the regulation of Cyclin E in  
95 wing disc and the relationship between Cyclin E and Hh pathway.

96 Apontic (Apt) has been identified as a transcription factor involved in development of  
97 tracheae, head, heart and nervous system (Eulenberg and Schuh, 1997; Gellon et al., 1997;  
98 Liu et al., 2003; Su et al., 1999). Apt can suppress metastasis (Woodhouse et al., 2003) and is  
99 required in the nervous system for normal sensitivity to ethanol sedation (McClure and  
100 Heberlein, 2013). Moreover, Apt participates in JAK/STAT signaling pathway to limit border  
101 cells migration (Starz-Gaiano et al., 2009; Starz-Gaiano et al., 2008; Yoon et al., 2011).  
102 However, the role of Apt in wing development is unknown.

103 In this study, we found that both loss of and overexpression of *apt* resulted in defect wings.  
104 Further studies demonstrated that loss of *apt* attenuated the expression of *hh* and *cyclin E*,  
105 while *apt* overexpression upregulated *hh* and *cyclin E*. In addition, we found inherent Apt  
106 binding sites in the promoter region of *hh* and *cyclin E*. Mutating the sites inhibited the  
107 expression of *hh* and *cyclin E*. Collectively, Apt activates the expression of *hh* and *cyclin E* to  
108 allow proper wing development.

109

## 110 **RESULTS**

### 111 **Apt is expressed in the wing disc and is required for wing development**

112 As the first attempt to investigate the function of *apt* during wing development, we analyzed  
113 *apt* expression pattern in the wing disc by immunostaining using anti-Apt antibody. In the  
114 wing disc, Apt was detected in PE cells as revealed by co-localization with a PE marker Ubx  
115 (Fig. 1A). Apt was also detected in DP cells (Fig. 1B). These data clearly demonstrate that Apt  
116 is expressed in both the PE and DP of the wing disc, suggesting its possible role in wing  
117 development.

118 To analyze the role of Apt during wing development, we would examine the developing  
119 wing of homozygous *apt* null mutant. However, *apt* null homozygotes die as embryos

120 (Eulenberg and Schuh, 1997). Therefore, we induced *apt* loss of function mutant clones in the  
121 wing disc using the *FLP/FRT* system (Theodosiou and Xu, 1998). The formation of these  
122 clones resulted in a small wing with a blistered phenotype (Fig. 1D) compared with the  
123 control wing (Fig. 1C). Furthermore, RNAi-mediated knockdown of *apt* in DP cells of the  
124 wing disc resulted in a small wing, and also reduced the width between vein 3 and vein 4 (Fig.  
125 1E,F). Given that the space between vein 3 and vein 4 is a characteristic monitor of Hh  
126 pathway activity in adult wings, knockdown of *apt*-mediated narrowing the space indicates  
127 that Apt possibly regulates Hh pathway. RT-PCR analyses showed effective knockdown of *apt*  
128 mRNA level upon *apt*-RNAi (Fig. S1). To investigate the effect when *apt* is overexpressed,  
129 we employed *MS1096-Gal4* driver to express UAS-*apt* in both the PE and DP of the wing  
130 disc. Abnormal wings were induced by overexpression of *apt* (Fig. 1G). The wing was  
131 diminished and blistered, the pattern of veins was disrupted and extra abnormal bristles were  
132 induced in the wing margin. In addition, when UAS-*apt* was expressed by a stronger *gal4*  
133 (*sd-Gal4*) in DP cells, both wings and halteres were lost (Fig. 1H). Taken together, the  
134 loss-of-function and gain-of-function analyses indicate that Apt is indispensable for wing  
135 development.

136

### 137 **Apt regulates the expression of *hh* in the wing disc**

138 The observation that knockdown of *apt* narrowed the space between vein 3 and vein 4 implied  
139 that Apt might modulate Hh pathway in wings. As an important initiator of Hh pathway, *hh*  
140 gene expresses in the wing disc (Cho et al., 2000; Tabata and Kornberg, 1994). We first  
141 compared the expression of *apt* and *hh* in the wing disc, and found that Apt and *hh-lacZ* were  
142 co-expressed in PE cells (Fig. 2D-F) and posterior compartment cells of the DP (Fig. 2G-I) in  
143 the second instar larval disc. Furthermore, *apt* exhibited genetic interaction with *hh*.  
144 Transheterozygotes of two sets of *hh* alleles (*hh<sup>bar3</sup>/hh<sup>2</sup>* and *hh<sup>Mir</sup>/hh<sup>2</sup>*) exhibited smaller wing  
145 with an extra crossvein (Fig. S2), demonstrating that it is a phenotype of *hh* mutant. While  
146 wings of animals heterozygous for *hh<sup>2</sup>* or *apt*-null allele were normal, transheterozygotes of  
147 *apt*-null allele and *hh<sup>2</sup>* showed the same wing phenotype (Fig. 2A-C). These results raised the  
148 possibility that Apt regulates transcription of *hh*. To test the possibility, we analyzed the  
149 expression of *hh* under loss-of-function and overexpression of Apt. The expression of *hh-lacZ*

150 and Hh was significantly reduced in the *apt* mutant clones in the PE (Fig. 2J-L; Fig. S3A-C)  
151 and the DP (Fig. 2M-O; Fig. S3D-F). Moreover, the expression of *hh* was significantly  
152 reduced in the wing disc of larvae upon RNAi-knockdown of *apt* (Fig. S4). By contrast,  
153 overexpression of Apt increased the expression of *hh-lacZ* (Fig. 2P-R) and *hh* (Fig. S4,  
154 S5G-I). The expression of Hh also decreased in the *apt* mutant clones of the eye disc and the  
155 salivary gland (Fig. S5A-F). These results indicate that Apt activates the expression of *hh*.

156

### 157 **Apt directly controls *hh* in the wing disc**

158 To address how Apt activates the expression of *hh*, we focused on a 15-kb region of the *hh*  
159 locus known to reproduce the normal *hh* expression pattern in the wing disc (Lee et al., 1992).  
160 We identified one potential Apt binding sequence (Liu et al., 2003) within the region (Fig.  
161 3A). We next assessed the function of the Apt-binding site in *hh* using a CRISPR-Cas9  
162 system (Kondo and Ueda, 2013). Since the designed gRNA contained the Apt-binding site,  
163 four Apt-binding site deletion mutants and two insertion mutants were generated (Fig. 3B-C;  
164 Fig. S6A). Homozygotes of these mutations showed reduced expression of *hh* mRNA and Hh  
165 protein (Fig. 3D-E; Fig. S6B) and exhibited the small wing and reduced vein 3-4 spacing  
166 phenotypes (Fig. 3F; Fig. S6C-D). Effect of *hh*<sup>*AptDB1*</sup> mutation on the *hh* function was also  
167 examined under the *hh*<sup>2</sup> heterozygous background. While wings of animals heterozygous for  
168 *hh*<sup>2</sup> or *hh*<sup>*AptDB1*</sup> were normal, transheterozygotes of *hh*<sup>*AptDB1*</sup> and *hh*<sup>2</sup> showed the same extra  
169 vein phenotype (Fig. 3G-I) as did transheterozygotes of *apt*-null allele and *hh*<sup>2</sup>. Taken  
170 together, these data suggest that Apt directly regulates the expression of *hh* in the wing disc  
171 for proper wing development.

172

### 173 **Apt activates the *cyclin E* expression in the wing disc**

174 We have reported that Apt induces the *cyclin E* expression in the eye disc (Liu et al.,  
175 2014). Therefore, we examined whether Apt regulates *cyclin E* also in the wing disc. To do  
176 this, we first performed a double-staining experiment. In the wild-type wing disc, Apt and  
177 Cyclin E were co-expressed (Fig. 4A-C). Furthermore, the expression of Cyclin E was  
178 significantly reduced in the *apt* mutant clones (Fig. 4D-F; Fig. S7A). The expression of *cyclin*  
179 *E* mRNA was also reduced upon RNAi-knockdown of *apt* in the wing disc (Fig. S7B). By

180 contrast, the expression of Cyclin E and its mRNA was increased by overexpression of Apt in  
181 the wing disc using *MS1096-Gal4* and *UAS-apt* (Fig. 4G-I; Fig. S7B). These results indicate  
182 that Apt activates the expression of *cyclin E* in the wing disc.

183 We then asked whether the regulation of *cyclin E* by Apt is mediated through Hh. To test  
184 this idea, we compared the expression of *hh* and *cyclin E* upon overexpression of Apt in the  
185 wing disc. Both *hh* and Cyclin E were induced by overexpression of Apt (Fig. 2Q,4H).  
186 However, their expression patterns were different. Cyclin E was induced in all region of the  
187 wing disc, whereas the expression of *hh* was restricted in the posterior compartment.  
188 Moreover, the expression of Cyclin E was not changed by RNAi-knockdown of *hh* using  
189 *MS1096-Gal4* and *UAS-hh<sup>RNAi</sup>* (Fig. 4J) and in an *hh* gain of function mutant *hh<sup>Mrt</sup>* that  
190 exhibits ectopic expression of *hh* in the anterior compartment (Tabata and Kornberg, 1994)  
191 (Fig. 4K). These data suggest that the activation of *cyclin E* by Apt is independent of Hh in  
192 the wing disc (Fig. 4L).

193

#### 194 **Apt directly controls *cyclin E* in the wing disc**

195 Since Apt directly activates the expression of *cyclin E* in the eye disc (Liu et al., 2014), we  
196 anticipated a direct role of Apt in the expression of *cyclin E* also in the wing disc. This  
197 expectation was verified by transgenic reporter assays. The reporter gene (Liu et al., 2014)  
198 carries the endogenous promoter and the *cyclin E* regulatory element containing a wild-type  
199 Apt-binding site (*cycEPlacZ*) (Fig. 5A) or a mutated site (*cycEMPlacZ*) (Fig. 5E). Although  
200 *cycEPlacZ* with the wild type binding site recapitulated the *cyclin E* expression in the wing  
201 disc (Fig. 5B-D), base substitutions in the Apt-binding site in *cycEMPlacZ* abolished the lacZ  
202 expression (Fig. 5F-H). These results indicate that Apt directly activates *cyclin E* through its  
203 binding site in the regulatory region of *cyclin E*.

204

#### 205 **Apt controls cell proliferation by inducing *hh* and *cyclin E***

206 Because both Hh and Cyclin E are involved in cell proliferation (Jiang and Hui, 2008;  
207 Knoblich et al., 1994), defects in *apt* would affect the cell number in the wing disc. As  
208 expected, we observed significant decrease in the cell number in an *apt* mutant clone using  
209 DAPI staining (Fig. 6B). Moreover, phalloidin labeling revealed disruption of the linear

210 arrangement of cells in the clone (Fig. 6C). When Apt was overexpressed in the wing disc, the  
211 number of DAPI-stained cells was not significantly changed from that in the control disc  
212 (compare Fig. 6F with 6D). However, the linear arrangement of cells was disrupted (compare  
213 Fig. 6G with 6E). Since Hh and Cyclin E are required for the regulation of apoptosis  
214 (Guerrero and Ruiz i Altaba, 2003; Hwang and Clurman, 2005; Ruiz i Altaba, 1999), we  
215 asked whether the overexpression phenotypes are caused by apoptosis. To test this, we  
216 investigated apoptosis in wing discs by staining with anti-Caspase-3 antibody. In the third  
217 instar wing disc from *apt* mutant clones and wild type, few apoptotic cells were observed (Fig.  
218 6H-J). However, in the wing disc from an Apt-overexpressed larva, the number of apoptotic  
219 cells was significantly increased (Fig. 6K). This presumably explains why wing size was  
220 reduced upon overexpression of Apt (Fig. 1G).

221 Homozygotes of *hh* mutations for the Apt-binding site exhibited the small wing but not the  
222 blistered phenotype. However, *hh* and *cyclin E* double mutant recapitulates the smaller and  
223 blistered wing. While *CycE<sup>2</sup>/+* flies showed normal wings, three percent of *hh<sup>bar3</sup>/hh<sup>bar3</sup>* and  
224 eighteen percent of *CycE<sup>2</sup>/+; hh<sup>bar3</sup>/hh<sup>bar3</sup>* flies showed the smaller and blistered phenotypes  
225 (Fig. S8A-C). We also observed genetic interaction between *hh* and *cyclin E* in the extra  
226 crossvein phenotype. While *CycE<sup>JP</sup>/+* and *hh<sup>2</sup>/+* flies showed normal wings, fifty-four percent  
227 of *CycE<sup>JP</sup>/+; hh<sup>2</sup>/+* flies exhibited wings with the extra crossvein (Fig. S8D-F). Collectively,  
228 these data suggest that Apt controls wing development by inducing appropriate amounts of  
229 Hh and Cyclin E.

230

## 231 **DISCUSSION**

232 Here, we revealed that the transcription factor Apt regulates *Drosophila* wing development, at  
233 least in part, through directly activating the expression of *hh* and *cyclin E* to control wing  
234 patterning and growth. Both loss-of-function and gain-of function assays clearly demonstrated  
235 that Apt is vital for wing development. Further studies showed that knockdown of *apt*  
236 attenuated, while overexpression of *apt* activated the expression of *hh* and *cyclin E*.

237 In the wing disc, Hh exclusively expresses in the P compartment. After many modifications,  
238 the mature Hh ligands are secreted from the P compartment and reach ~12cell rows near A/P  
239 boundary of the A compartment (Basler and Struhl, 1994; Tabata et al., 1992; Tabata and



240 Kornberg, 1994). Ci expresses solely in the A compartment (Slusarski et al., 1995). Without  
241 the Hh, full-length Ci is ubiquitinated by SCF<sup>Slimb</sup> to partial degradation, culminating in  
242 formation a truncated transcriptional repressor termed Ci<sup>R</sup>. Ci<sup>R</sup> enters into the nucleus to  
243 repress the expression of *hh* in the A compartment (Aza-Blanc et al., 1997; Jiang and Struhl,  
244 1998; Smelkinson and Kalderon, 2006). In this study, we found the ubiquitous expression of  
245 Apt in the wing disc (Fig. 1A,B). However, the expression of *hh* is restricted in the P  
246 compartment of DP cells. Overexpression of *apt* in the wing disc with the MS1096-GAL4  
247 driver emerges the ectopic expression of *hh* in the A compartment, suggesting that Apt is  
248 sufficient to turn on *hh* expression. We speculate that during the normal development progress,  
249 Apt might cooperates with others factors (such as Ci<sup>R</sup>) to restrict the expression region of *hh*.  
250 It is interesting to investigate the relationship between Ci<sup>R</sup> and Apt.

251 To assess the importance of the Apt-binding site in the promoter region of *hh*, we first tried  
252 a transgenic reporter assay. However, the regulatory region of *hh* encompassing the upstream  
253 region and the 1st intron (~15 kb) (Lee et al., 1992) is too large to make a reporter construct  
254 for conventional P-element mediated transgenesis. Therefore, we employed the CRISPR-Cas9  
255 system (Kondo and Ueda, 2013) to mutagenize the endogenous Apt-binding site in the *hh*  
256 promoter. All 6 independent mutants exhibited the same phenotypes (reduced expression of  
257 *hh*, reduced wing size and the space between L3 and L4), suggesting that the observed  
258 phenotypes are not due to off-target effect of Cas9. Nevertheless, we inspected the possibility  
259 of off-target effect. Since our gRNA carries the binding sequence for Apt, a binding site of  
260 Apt in other than the *hh* promoter could be the most likely candidate for off-target. However,  
261 all the 6 mutants showed the wild type sequence around the Apt-binding site in the *cyclin E*  
262 promoter (Fig. S9). Furthermore, transheterozygotes between *hh*<sup>2</sup> and *hh*<sup>AptDB1</sup> exhibited the  
263 *hh* mutant phenotype, smaller wing with extra crossvein. Taken together, these data strongly  
264 suggest that the observed phenotypes are not due to off-target effect.

265 Although our data strongly support that Apt is a transcription factor of *hh*, mutating the Apt  
266 binding site on *hh* promoter does not induce severe phenotypes. Beside Apt, other factors  
267 might also regulate *hh* transcription. Therefore, both knockdown and overexpression of *apt*  
268 only moderately affect the expression of *hh*. Hh, an important morphogen, plays multifaceted  
269 roles in segmentation and wing patterning. Previous findings paid more attention on the

270 protein modification of Hh. The mechanism underlying *hh* transcription is not clear. Here our  
271 studies unveil that Apt acts as a transcription factor of *hh*.

272 While Hh has been implicated in induction of Cyclin E through Ci (Duman-Scheel et al.,  
273 2002), subsequent researches have shown that Cyclin E accumulates in the *Mad<sup>1-2</sup>Su(H)ci*  
274 mutant cells (Firth and Baker, 2005). So whether Hh activates *cyclin E* is controversial. In this  
275 study we showed that RNAi-mediated knockdown of *hh* or ectopic expression of *hh* in the  
276 anterior compartment did not change the expression of *cyclin E*. Taken together, these  
277 observations argue against the notion that *hh* regulates *cyclin E* in the wing disc.

278 Hyperactivation of Hh pathway has been complicated in many tumors (Clement et al., 2007;  
279 Jiang and Hui, 2008). It will be fruitful to investigate whether Apt is upregulated in  
280 Hh-related tumors. The previous work indicates that Apt involves in tumorigenesis  
281 (Woodhouse et al., 2003). It is also interesting to explore whether Apt regulates tumorigenesis  
282 through activating Hh signaling. Our finding that Apt regulates wing development through  
283 activating *hh* raises a possibility that Apt acts as a potential clinical target for Hh-related  
284 tumors.

285

## 286 MATERIALS AND METHODS

### 287 *Drosophila* Strains

288 Strains used were as follows. *apt<sup>P<sup>Δ4</sup></sup>* (Eulenberg and Schuh, 1997), *apt<sup>p2</sup>* (Liu et al., 2003),  
289 *cycEPlacZ* and *cycEMPlacZ* (Liu et al., 2014), *UAS-apt* (gift of D. Montell), *UAS-GFP* (gift  
290 of Y. Hiromi). *hh<sup>Mir</sup>* was obtained from *Drosophila* Genetic Resource Center. *hh<sup>2</sup>*, *hh<sup>Mrt</sup>*, *hh<sup>bar3</sup>*,  
291 *CycE<sup>2</sup>*, *CycE<sup>IP</sup>*, *hh-LacZ*, *MS1096-GAL4*, *sd-GAL4*, *dpp-Gal4*, *ptc-GAL4* and *UAS-hh<sup>RNAi</sup>*  
292 were obtained from Bloomington *Drosophila* Stock Center. *UAS-apt<sup>RNAi</sup>* was obtained from  
293 Tsinghua Fly Center. *y<sup>2</sup>cho<sup>2</sup>v<sup>1</sup>*; *attP40{nos-Cas9/CyO, y<sup>1</sup>v<sup>1</sup>P{nos-phiC31\int.NLS}X; attP40,*  
294 *y<sup>2</sup>cho<sup>2</sup>v<sup>1</sup>, y<sup>2</sup>cho<sup>2</sup>v<sup>1</sup>/Y<sup>hs-hid</sup>; Sp/CyO, y<sup>2</sup>cho<sup>2</sup>v<sup>1</sup>; PrDr/TM6C* were obtained from NIG-Fly.

295

### 296 Clonal analysis

297 Homozygous *apt* loss-of-function clones were generated by *hs-FLP/FRT* recombination  
298 (Theodosiou and Xu, 1998). *FRT42D* and *apt<sup>P<sup>Δ4</sup></sup>/CyO* were recombined to generate *FRT42D,*  
299 *apt<sup>P<sup>Δ4</sup></sup>*. Six pairs of *FRT42D, apt<sup>P<sup>Δ4</sup></sup>* cross to *Gla/CyO* were allowed to lay eggs in

300 G418-containing medium, and then test each line with *apt<sup>P2</sup>/CyO. hs-FLP; FRT42D*,  
301 *Ubi-GFP/CyO* crossed with *FRT42D, apt<sup>P44</sup>/CyO* were performed at 25°C. Heat shocks were  
302 performed 32-56 hours after egg-laying for 1.5 hours at 37.5°C.

303

#### 304 **Generation of CRISPR constructs**

305 To induce mutations in the Apt-binding site in the *hh* promoter region, we used a Cas9–gRNA  
306 system. We designed gRNA in the *hh* promoter region carrying the binding sequence of Apt  
307 (Fig. 3A). The corresponding sequence was introduced into the pBFv-U6.2 vector and the  
308 gRNA transgenic flies were generated as described (Kondo and Ueda, 2013). gRNA females  
309 were crossed to Cas9 males to obtain the founder animals. Male founders were crossed to  
310 female balancer. Offspring male flies were balanced and stocked. Genomic DNA was  
311 extracted from each offspring male and used for molecular characterization. PCR primers  
312 were designed to construct gRNA expression vectors and to amplify the promoter region of  
313 *cyclin E* (Table S1).

314

#### 315 **RT-qPCR analysis**

316 Wing discs were dissected from 40 third instar larvae. Total RNA was prepared from the  
317 dissected tissues using an RNAPrep Pure Tissue kit (TIANGEN #DP431). cDNAs were  
318 synthesized using a Prime Script<sup>TM</sup> II 1<sup>st</sup> strand cDNA synthesis kit (TaKaRa #6210A). qPCR  
319 was conducted with Bio-Rad CFX96 real-time system using a SuperReal PreMix Plus (SYBR  
320 Green) Kit (TIANGEN #FP205) in a 20 ul reaction containing 2 pmol of relevant primers.  
321 The amount of mRNA was normalized to that of control tubulin mRNA. PCR primers were  
322 designed to amplify the *hh* region (Table S1).

323

#### 324 **Antibodies and Immunohistochemistry**

325 Staining of larval tissues was performed as described previously (Liu et al., 2014). Larvae  
326 were dissected in PBS, fixed in 25 mM PIPES-KOH (pH 7.0), 0.5 mM EDTA, 0.25 mM  
327 MgSO<sub>4</sub> and 4% formaldehyde for 40 minutes on ice and then permeabilized for 15 minutes at  
328 room temperature in PBS containing 0.5% NP-40. The following primary antibodies were

329 used in overnight incubations at 4°C in blocking solution: rabbit anti-Apt (1:1000) (Liu et al.,  
330 2014), rabbit anti-Hh (1:800, gift of T. Tabata), rabbit anti-GFP (1:200, Molecular Probes),  
331 mouse anti-GFP (1: 400, Molecular Probes), rabbit anti-β-galactosidase (1:2000, Cappel),  
332 rabbit Caspase3 (1:50, Cell Signaling Technology), mouse anti-β-galactosidase (1:500,  
333 Sigma), FITC-conjugated phalloidin (1:200, Sigma), mouse anti-Ubx (1:10, Developmental  
334 Studies Hybridoma Bank (DSHB)), goat anti-Cyclin E (1:200, Santa Cruz). The secondary  
335 antibodies used were as follows: Alexa 488 donkey anti-rabbit IgG conjugate (1:500,  
336 Molecular Probes), Alexa 488 donkey anti-mouse IgG (1:500, Molecular Probes),  
337 Cy3-conjugated donkey anti-mouse IgG (1:500, Sigma), Cy3-conjugated goat anti-rabbit IgG  
338 (1:500, CWBIO), bovine anti-goat IgG-CFL 555 (1:500, Santa Cruz). Mounting used  
339 VECTASHIELD Mounting Medium with DAPI (Vector Labs). The caspase-3 staining was  
340 did as described previously (Rudrapatna et al., 2013).

341

#### 342 **Microscopy and Image Treatment**

343 Images were acquired in Leica TCS SP5 confocal microscope and Olympus cellSens, treated  
344 with Adobe Photoshop CS6 image programs. Wing size and space between vein 3 and vein 4  
345 or that between vein 1 and vein 2 were measured on each picture using the ImageJ computer  
346 program.

347

#### 348 **Statistical analysis**

349 Results are given as means SEM; each experiment included at least three independent  
350 samples and was repeated at least three times. Group comparisons were made by two-tailed  
351 unpaired Student's t-tests. \*P < 0.05; \*\*P < 0.01, and \*\*\*P < 0.001.

352

#### 353 **Acknowledgements**

354 We thank Denise J. Montell, Tetsuya Tabata, Jiong Chen, Yasushi Hiromi, Shigeo Hayashi,  
355 Ryu Ueda, Shu Kondo and Hua Tang, Tsinghua Fly Center, NIG-Fly, Kyoto stock and  
356 Bloomington Stock Center for providing antibodies, fly strains and technical advice.

357

#### 358 **Competing interests**

359 The authors declare no competing financial interests.

360

### 361 **Author Contributions**

362 X.F.W., S.H., and Q.X.L. designed research, X.F.W., Q.C., and C.L.F. performed experiments  
363 and X.F.W., Z.Z.Z., S.H., and Q.X.L. analyzed data and wrote the manuscript.

364

### 365 **Funding**

366 This work was supported by the National Basic Research Program of China (2012CB114600)  
367 and National Natural Science Foundation of China (31571502).

368

### 369 **Supplementary information**

370 Supplementary information available online at

371 <http://dev.biologists.org/lookup/suppl>

372

### 373 **References**

374 **Aza-Blanc, P., Ramirez-Weber, F. A., Laget, M. P., Schwartz, C. and Kornberg, T. B.**

375 (1997). Proteolysis that is inhibited by hedgehog targets Cubitus interruptus protein to  
376 the nucleus and converts it to a repressor. *Cell* **89**, 1043-1053.

377 **Basler, K. and Struhl, G.** (1994). Compartment boundaries and the control of Drosophila

378 limb pattern by hedgehog protein. *Nature* **368**, 208-214.

379 **Beachy, P. A., Karhadkar, S. S. and Berman, D. M.** (2004). Tissue repair and stem cell

380 renewal in carcinogenesis. *Nature* **432**, 324-331.

381 **Charron, F., Stein, E., Jeong, J., McMahon, A. P. and Tessier-Lavigne, M.** (2003). The

382 morphogen sonic hedgehog is an axonal chemoattractant that collaborates with  
383 netrin-1 in midline axon guidance. *Cell* **113**, 11-23.

384 **Cho, K. O., Chern, J., Izaddoost, S. and Choi, K. W.** (2000). Novel signaling from the

385 peripodial membrane is essential for eye disc patterning in Drosophila. *Cell* **103**,  
386 331-342.

387 **Clement, V., Sanchez, P., de Tribolet, N., Radovanovic, I. and Ruiz i Altaba, A.** (2007).

388 HEDGEHOG-GLI1 signaling regulates human glioma growth, cancer stem cell

- 389 self-renewal, and tumorigenicity. *Curr Biol* **17**, 165-172.
- 390 **Donnellan, R. and Chetty, R.** (1999). Cyclin E in human cancers. *FASEB journal : official*  
391 *publication of the Federation of American Societies for Experimental Biology* **13**,  
392 773-780.
- 393 **Duman-Scheel, M., Weng, L., Xin, S. and Du, W.** (2002). Hedgehog regulates cell growth  
394 and proliferation by inducing Cyclin D and Cyclin E. *Nature* **417**, 299-304.
- 395 **Eulenberg, K. G. and Schuh, R.** (1997). The tracheae defective gene encodes a bZIP protein  
396 that controls tracheal cell movement during Drosophila embryogenesis. *EMBO J* **16**,  
397 7156-7165.
- 398 **Firth, L. C. and Baker, N. E.** (2005). Extracellular signals responsible for spatially regulated  
399 proliferation in the differentiating Drosophila eye. *Dev Cell* **8**, 541-551.
- 400 **Gellon, G., Harding, K. W., McGinnis, N., Martin, M. M. and McGinnis, W.** (1997). A  
401 genetic screen for modifiers of Deformed homeotic function identifies novel genes  
402 required for head development. *Development* **124**, 3321-3331.
- 403 **Guerrero, I. and Ruiz i Altaba, A.** (2003). Development. Longing for ligand: hedgehog,  
404 patched, and cell death. *Science* **301**, 774-776.
- 405 **Hochman, E., Castiel, A., Jacob-Hirsch, J., Amariglio, N. and Izraeli, S.** (2006).  
406 Molecular pathways regulating pro-migratory effects of Hedgehog signaling. *J Biol*  
407 *Chem* **281**, 33860-33870.
- 408 **Hwang, H. C. and Clurman, B. E.** (2005). Cyclin E in normal and neoplastic cell cycles.  
409 *Oncogene* **24**, 2776-2786.
- 410 **Jiang, J. and Hui, C. C.** (2008). Hedgehog signaling in development and cancer. *Dev Cell* **15**,  
411 801-812.
- 412 **Jiang, J. and Struhl, G.** (1998). Regulation of the Hedgehog and Wingless signalling  
413 pathways by the F-box/WD40-repeat protein Slimb. *Nature* **391**, 493-496.
- 414 **Keyomarsi, K., O'Leary, N., Molnar, G., Lees, E., Fingert, H. J. and Pardee, A. B.** (1994).  
415 Cyclin E, a potential prognostic marker for breast cancer. *Cancer research* **54**,  
416 380-385.
- 417 **Knoblich, J. A., Sauer, K., Jones, L., Richardson, H., Saint, R. and Lehner, C. F.** (1994).  
418 Cyclin E controls S phase progression and its down-regulation during Drosophila

- 419 embryogenesis is required for the arrest of cell proliferation. *Cell* **77**, 107-120.
- 420 **Kondo, S. and Ueda, R.** (2013). Highly improved gene targeting by germline-specific Cas9  
421 expression in *Drosophila*. *Genetics* **195**, 715-721.
- 422 **Lee, J. J., von Kessler, D. P., Parks, S. and Beachy, P. A.** (1992). Secretion and localized  
423 transcription suggest a role in positional signaling for products of the segmentation  
424 gene hedgehog. *Cell* **71**, 33-50.
- 425 **Liu, Q. X., Jindra, M., Ueda, H., Hiromi, Y. and Hirose, S.** (2003). *Drosophila* MBF1 is a  
426 co-activator for Tracheae Defective and contributes to the formation of tracheal and  
427 nervous systems. *Development* **130**, 719-728.
- 428 **Liu, Q. X., Wang, X. F., Ikeo, K., Hirose, S., Gehring, W. J. and Gojobori, T.** (2014).  
429 Evolutionarily conserved transcription factor Apontic controls the G1/S progression  
430 by inducing cyclin E during eye development. *Proc Natl Acad Sci U S A* **111**,  
431 9497-9502.
- 432 **Matusek, T., Wendler, F., Poles, S., Pizette, S., D'Angelo, G., Furthauer, M. and Therond,**  
433 **P. P.** (2014). The ESCRT machinery regulates the secretion and long-range activity of  
434 Hedgehog. *Nature* **516**, 99-103.
- 435 **McClure, K. D. and Heberlein, U.** (2013). A small group of neurosecretory cells expressing  
436 the transcriptional regulator *apontic* and the neuropeptide *corazonin* mediate ethanol  
437 sedation in *Drosophila*. *J Neurosci* **33**, 4044-4054.
- 438 **McClure, K. D. and Schubiger, G.** (2005). Developmental analysis and squamous  
439 morphogenesis of the peripodial epithelium in *Drosophila* imaginal discs.  
440 *Development* **132**, 5033-5042.
- 441 **Milner, M., Bleasby, A. and Kelly, S.** (1984). The role of the peripodial membrane of leg and  
442 wing imaginal discs of *Drosophila melanogaster* during evagination and  
443 differentiation in vitro. *Wilhelm Roux's Arch. Dev. Biol.* **193**, 180-186.
- 444 **Minella, A. C., Loeb, K. R., Knecht, A., Welcker, M., Varnum-Finney, B. J., Bernstein, I.**  
445 **D., Roberts, J. M. and Clurman, B. E.** (2008). Cyclin E phosphorylation regulates  
446 cell proliferation in hematopoietic and epithelial lineages in vivo. *Genes Dev* **22**,  
447 1677-1689.
- 448 **Moroy, T. and Geisen, C.** (2004). Cyclin E. *The international journal of biochemistry & cell*

- 449 *biology* **36**, 1424-1439.
- 450 **Nahmad, M. and Stathopoulos, A.** (2009). Dynamic interpretation of hedgehog signaling in  
451 the *Drosophila* wing disc. *PLoS Biol* **7**, e1000202.
- 452 **Neufeld, T. P., de la Cruz, A. F., Johnston, L. A. and Edgar, B. A.** (1998). Coordination of  
453 growth and cell division in the *Drosophila* wing. *Cell* **93**, 1183-1193.
- 454 **Richardson, H., O'Keefe, L. V., Marty, T. and Saint, R.** (1995). Ectopic cyclin E  
455 expression induces premature entry into S phase and disrupts pattern formation in the  
456 *Drosophila* eye imaginal disc. *Development* **121**, 3371-3379.
- 457 **Rudrapatna, V. A., Bangi, E. and Cagan, R. L.** (2013). Caspase signalling in the absence of  
458 apoptosis drives Jnk-dependent invasion. *EMBO Rep* **14**, 172-177.
- 459 **Ruiz i Altaba, A.** (1999). Gli proteins and Hedgehog signaling: development and cancer.  
460 *Trends Genet* **15**, 418-425.
- 461 **Slusarski, D. C., Motzny, C. K. and Holmgren, R.** (1995). Mutations that alter the timing  
462 and pattern of cubitus interruptus gene expression in *Drosophila melanogaster*.  
463 *Genetics* **139**, 229-240.
- 464 **Smelkinson, M. G. and Kalderon, D.** (2006). Processing of the *Drosophila* hedgehog  
465 signaling effector Ci-155 to the repressor Ci-75 is mediated by direct binding to the  
466 SCF component Slimb. *Curr Biol* **16**, 110-116.
- 467 **Starz-Gaiano, M., Melani, M., Meinhardt, H. and Montell, D.** (2009). Interpretation of the  
468 UPD/JAK/STAT morphogen gradient in *Drosophila* follicle cells. *Cell Cycle* **8**,  
469 2917-2925.
- 470 **Starz-Gaiano, M., Melani, M., Wang, X., Meinhardt, H. and Montell, D. J.** (2008).  
471 Feedback inhibition of Jak/STAT signaling by apontic is required to limit an invasive  
472 cell population. *Dev Cell* **14**, 726-738.
- 473 **Strigini, M. and Cohen, S. M.** (1997). A Hedgehog activity gradient contributes to AP axial  
474 patterning of the *Drosophila* wing. *Development* **124**, 4697-4705.
- 475 **Su, M. T., Venkatesh, T. V., Wu, X., Golden, K. and Bodmer, R.** (1999). The pioneer gene,  
476 apontic, is required for morphogenesis and function of the *Drosophila* heart. *Mech*  
477 *Dev* **80**, 125-132.
- 478 **Tabata, T., Eaton, S. and Kornberg, T. B.** (1992). The *Drosophila* hedgehog gene is



479 expressed specifically in posterior compartment cells and is a target of engrailed  
480 regulation. *Genes Dev* **6**, 2635-2645.

481 **Tabata, T. and Kornberg, T. B.** (1994). Hedgehog is a signaling protein with a key role in  
482 patterning *Drosophila* imaginal discs. *Cell* **76**, 89-102.

483 **Theodosiou, N. A. and Xu, T.** (1998). Use of FLP/FRT system to study *Drosophila*  
484 development. *Methods* **14**, 355-365.

485 **Woodhouse, E. C., Fisher, A., Bandle, R. W., Bryant-Greenwood, B., Charboneau, L.,**  
486 **Petricoin, E. F., 3rd and Liotta, L. A.** (2003). *Drosophila* screening model for  
487 metastasis: Semaphorin 5c is required for l(2)gl cancer phenotype. *Proc Natl Acad Sci*  
488 *U S A* **100**, 11463-11468.

489 **Yoon, W. H., Meinhardt, H. and Montell, D. J.** (2011). miRNA-mediated feedback  
490 inhibition of JAK/STAT morphogen signalling establishes a cell fate threshold. *Nat*  
491 *Cell Biol* **13**, 1062-1069.

492

#### 493 **Figure legends**

#### 494 **Fig. 1. Apt is expressed in the wing disc and required for wing development.**

495 (A) A single optical section of the PE of the wing disc from a second instar larva and the  
496 co-localization of Apt and Ubx (PE marker). (B) A single optical section of the DP of the  
497 wing disc from a second instar larva. (C) The adult wing of *yw*. (D) The adult wing of *apt<sup>P14</sup>*  
498 clones. The arrow indicates the blistered wing. (E) The adult wings of *sd-GAL4; UAS-GFP*  
499 and *sd-GAL4; UAS-apt<sup>RNAi</sup>*. (F) Quantification of the intervein region between L3 and L4  
500 relative to that between L1 and L2 (*sd>GFP* value was set as 100%) of *sd-GAL4; UAS-GFP*  
501 and *sd-GAL4; UAS-apt<sup>RNAi</sup>* by ImageJ. Error bars, SEM. Student's t tests, \*\*\*p < 0.001. (G)  
502 The adult wing of *MS1096-GAL4; UAS-apt*. (H) The adult wing of *sd-GAL4; UAS-apt*. Scale  
503 bars, 200  $\mu$ m.

504

#### 505 **Fig. 2. Apt regulates the expression of hh.**

506 (A-C) Genetic interaction between *apt* and *hh*. Adult wings of *apt<sup>P14</sup>/+; +/+* (A) and *+/+;*  
507 *hh<sup>2</sup>/+* (B) show normal pattern. (C) Forty percent of *apt<sup>P14</sup>/+; hh<sup>2</sup>/+* wings exhibited abnormal  
508 morphologies in anterior crossvein (ACV). An arrowhead indicates the extra ACV. Total

509 numbers of analyzed wings were A, 158; B, 157; C, 116. (D-F) The expression of Apt (D) and  
510 *hh-lacZ* (E) in PE cells. (G-I) The expression of Apt (G) and *hh-lacZ* (H) in DP cells. (J-L)  
511 The decreased expression of *hh-lacZ* (K) in the *apt<sup>PA4</sup>* clones of the PE (J). Clones are marked  
512 by white-dotted lines. (M-O) The decreased expression of *hh-lacZ* (N) in the *apt<sup>PA4</sup>* clones of  
513 the DP (M). Clones are marked by white-dotted lines. (P-R) Overexpressed Apt (P) increased  
514 the expression of *hh* (Q).

515

516 **Fig. 3. Apt directly regulates the expression of *hh* through its binding site in the *hh***  
517 **promoter region.**

518 (A) Schematic representation of the Apt-binding site in the genomic sequence of *hh*. The  
519 arrow represents transcription start site and the numbers in base pairs are distance from the  
520 start site. (B) Sequences of a wild-type allele and a heterozygous mutant of *hh<sup>ΔaptDB1</sup>*. The  
521 sequence of the mutant allele was inferred by subtracting a wild-type sequence from the  
522 mixed sequence. The deleted sequence is highlighted in yellow. (C) Cas9-induced  
523 mutagenesis at the *hh* locus. The *hh* locus in Cas9-induced mutants was PCR-amplified and  
524 sequenced. The wild-type sequence is shown at the top as a reference. The Cas9-gRNA target  
525 sequence is underlined with the protospacer-adjacent motifs (PAM) indicated in green.  
526 Deleted nucleotides in *hh<sup>ΔaptDB1</sup>* are shown as dashes. The deletion size is shown next to the  
527 sequence. (D) RT-qPCR analyses of *hh* mRNA in the wing disc of third instar larvae from *yw*  
528 or *hh<sup>ΔaptDB1</sup>*. Error bars, SEM from three independent experiments. Student's t tests, \**p* < 0.05.  
529 (E) The wing disc of third instar larvae from *yw* or *hh<sup>ΔaptDB1</sup>* was stained with an anti-Hh  
530 antibody. The expression levels of Hh were determined by mean fluorescence. Error bars,  
531 SEM. \*\*\**p* < 0.001. (F-I) Deletion of the Apt-binding site in the *hh* promoter affects wing  
532 development. The wing size and the intervein region between L3 and L4 relative to that  
533 between L1 and L2 (control value was set as 100%) were decreased in *hh<sup>ΔaptDB1</sup>*. Error bars,  
534 SEM. Student's t tests, \*\*\**p* < 0.001. *hh<sup>2</sup>/+* (G) or *hh<sup>ΔaptDB1</sup>/+* (H) adult wing shows a normal  
535 phenotype. All adult wings of *hh<sup>ΔaptDB1</sup>/hh<sup>2</sup>* transheterozygotes exhibited abnormal  
536 morphologies in ACV (I). An arrowhead indicates the extra ACV. Total numbers of analyzed  
537 wings were G, 157; H, 132; I, 74. Scale bars, 200 μm.

538

539 **Fig. 4. Apt controls the expression of cyclin E.**

540 (A-C) The expression of Apt (A) and Cyclin E (B) in the PE of control wing disc. (D-F)  
541 Decreased Cyclin E (E) expression in the *apt* mutant clones (D). (G-I) Overexpressed Apt  
542 with MS1096-GAL4 (G) increased the expression of Cyclin E (H). (J, K) The expression of  
543 Cyclin E in the wing disc from the *hh*<sup>RNAi</sup> knockdown (J) and *hh* gain of function mutant  
544 animals (K). (L) Regulation of *hh* and *cyclin E* by Apt in the wing disc. Wing discs from third  
545 instar larvae of wild-type (A-C), *hs-FLP; FRT42D, Ubi-GFP/FRT42D, apt*<sup>P<sup>14</sup></sup> (D-F),  
546 *MS1096-GAL4; UAS-apt* (G-I), *MS1096-GAL4; UAS-hh*<sup>RNAi</sup> (J) and *hh*<sup>Mrt</sup> (K) animals were  
547 stained with the anti-Apt antibody (A, G), the anti-GFP antibody (D), the anti-Cyclin E  
548 antibody (B, E, H, J and K). (C, F, I) Merged images of A and B, D and E, G and H,  
549 respectively.

550

551 **Fig. 5. Apt directly regulates the expression of cyclin E through its binding site in the**  
552 ***cyclin E* promoter region.**

553 (A) Schematic illustration of the lacZ reporter construct driven by the *cyclin E* promoter  
554 carrying the wild type Apt binding site. (B-D) The reporter *cycEPlacZ* (C) was coexpressed  
555 with the endogenous Apt (B) in the wing disc. (E) Schematic illustration of the lacZ reporter  
556 construct driven by the *cyclin E* promoter carrying the mutant Apt binding site. (F-H) The  
557 expression of reporter *cycEMPlacZ* (G). Wing discs of third instar larvae were stained with  
558 anti-Apt antibody (B and F) and anti-β-galactosidase antibody (C and G). (D and H) Merged  
559 images of B and C and of F and G, respectively.

560

561 **Fig. 6. Apt is required for production of proper cell number and arrangement of wing**  
562 **discs.**

563 (A-C) Cell number (B, marked by DAPI) and array of cells (C, marked with phalloidin) were  
564 affected in an *apt* mutant clone (A, lack of the GFP signals and marked with a broken line).  
565 (D, E) Cell number (D) and array (E) from a wild-type wing disc were visualized with DAPI  
566 (D) and phalloidin (E). (F, G) Overexpression of Apt in the wing pouch resulted in slight  
567 decrease in the cell number (F) and irregular arrangement of cells (G). (H-J) Apoptosis was  
568 barely detectable in the *apt* mutant clones (H, I) and wild-type wing disc (J). (K)

569 Overexpressed Apt in the wing disc increased the number of apoptotic cells. The wing discs  
570 of *hs-FLP; FRT42D, Ubi-GFP/FRT42D, apt<sup>P44</sup>* (A-C, H, I), wild-type (D, E and J) and  
571 *MS1096-GAL4; UAS-apt* (F, G and K) animals were stained with the anti-GFP antibody (A  
572 and H), DAPI (B, D and F), phalloidin (C, E and G) and Caspase-3 antibody (H-K).  
573



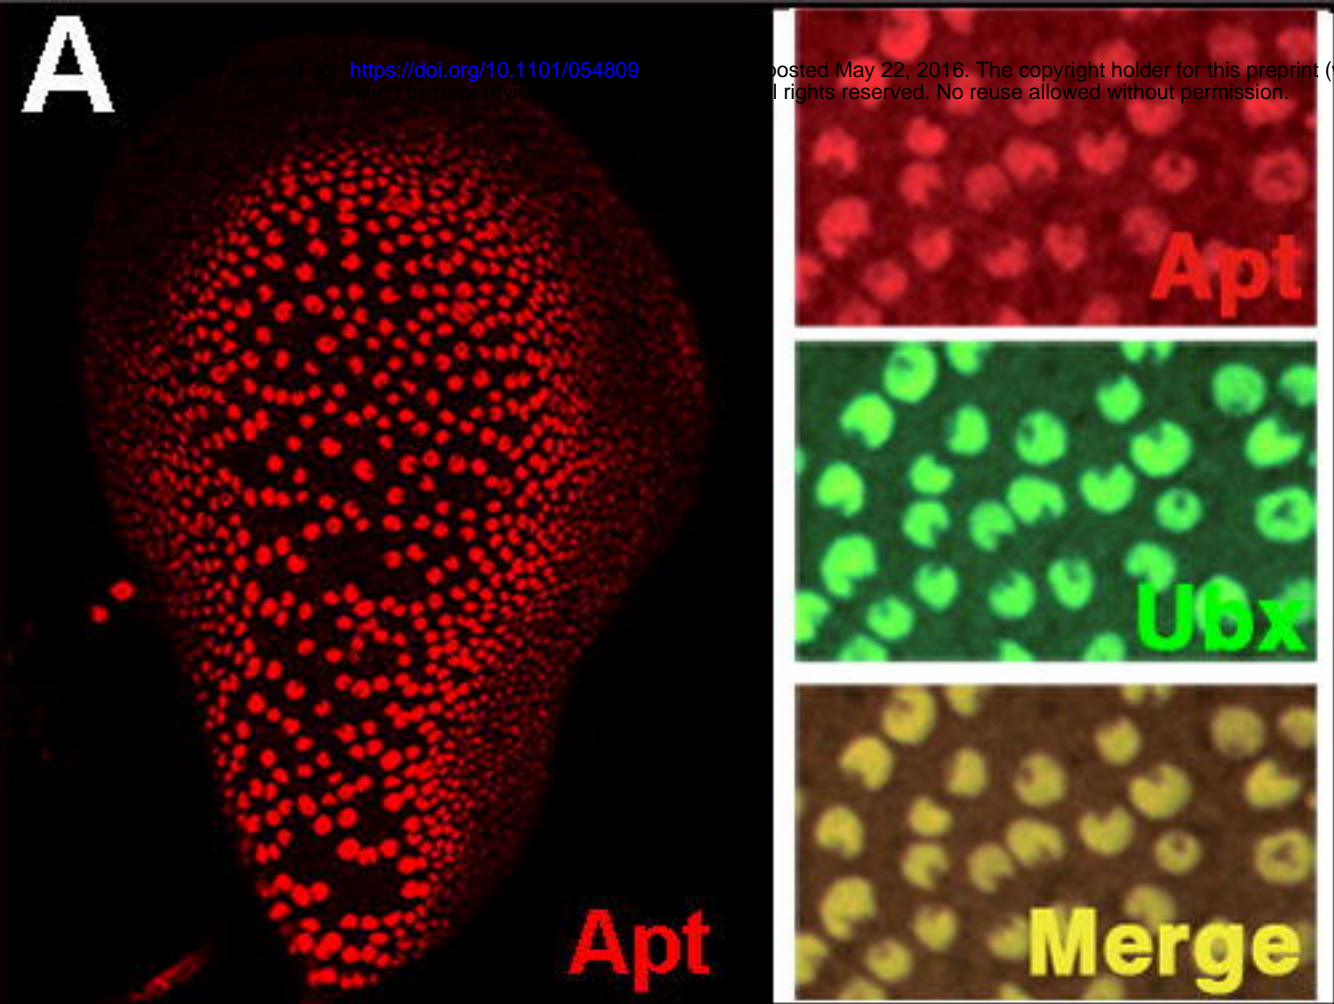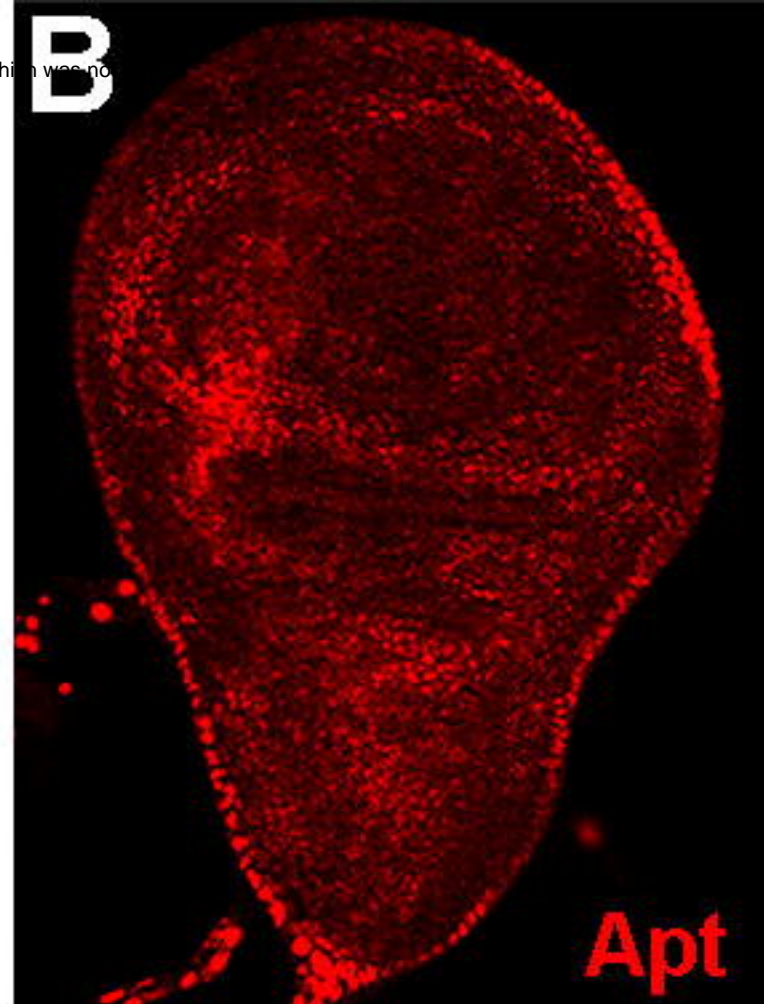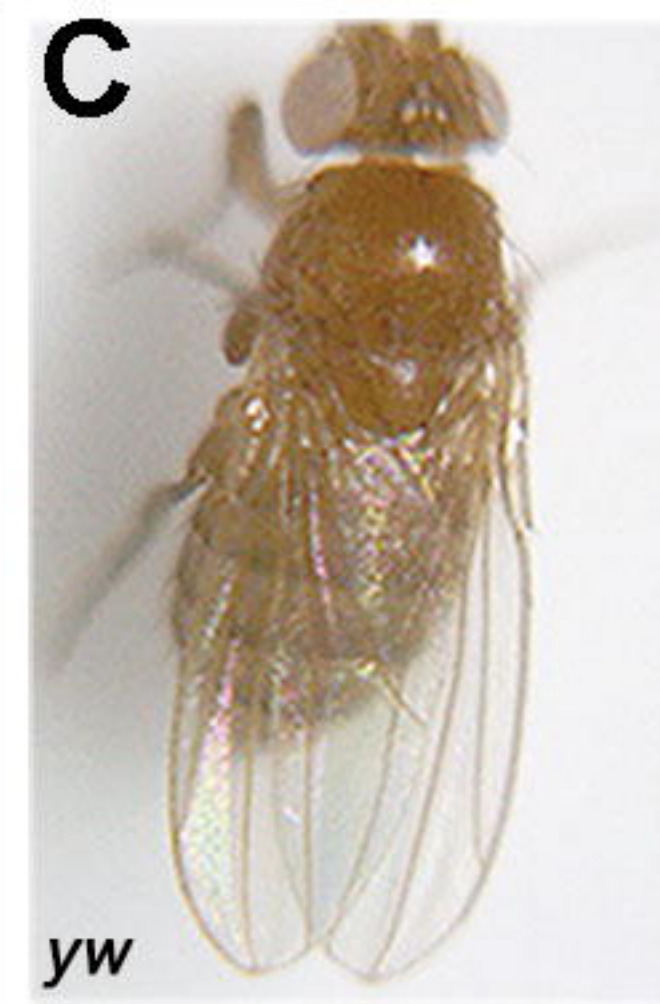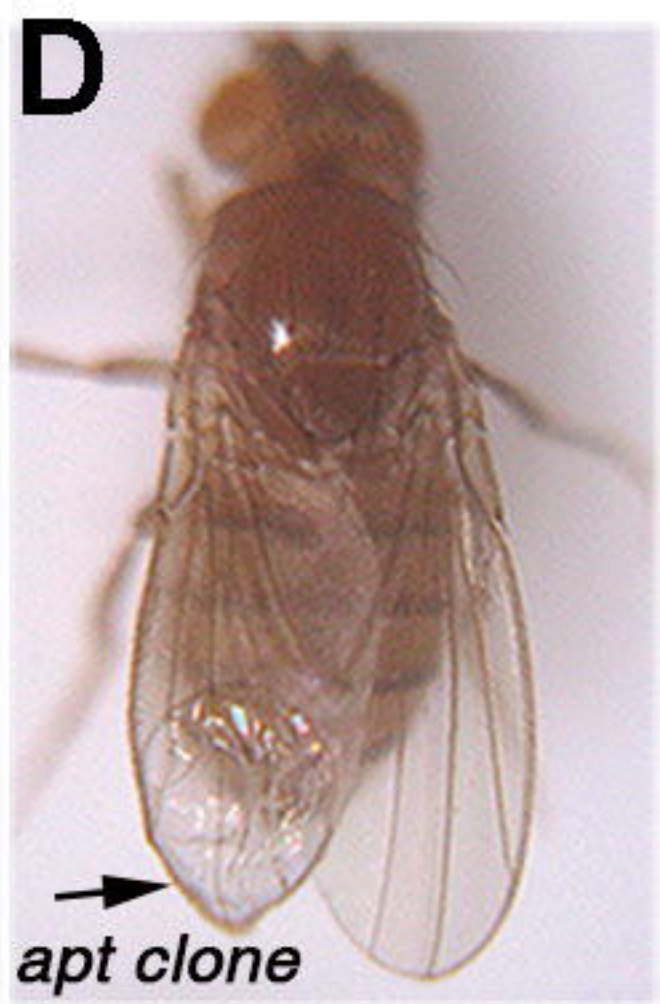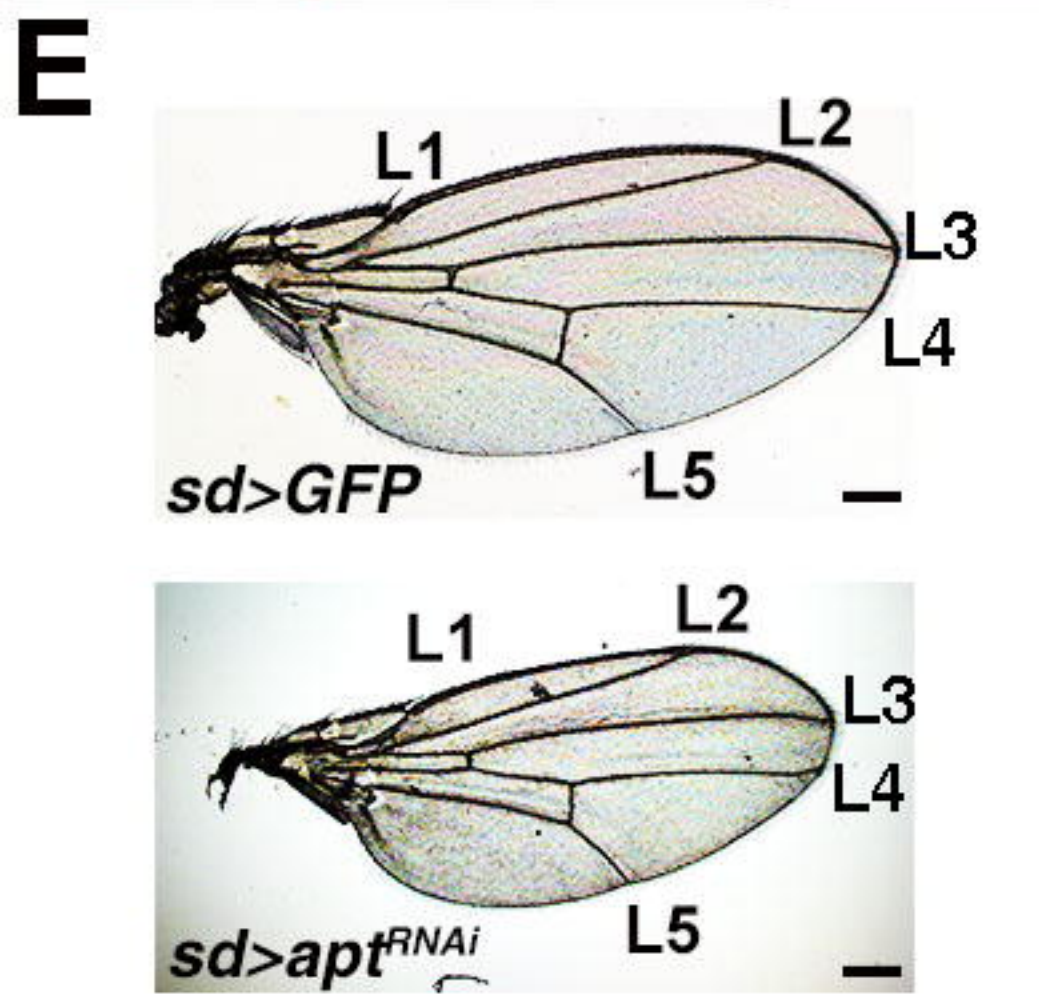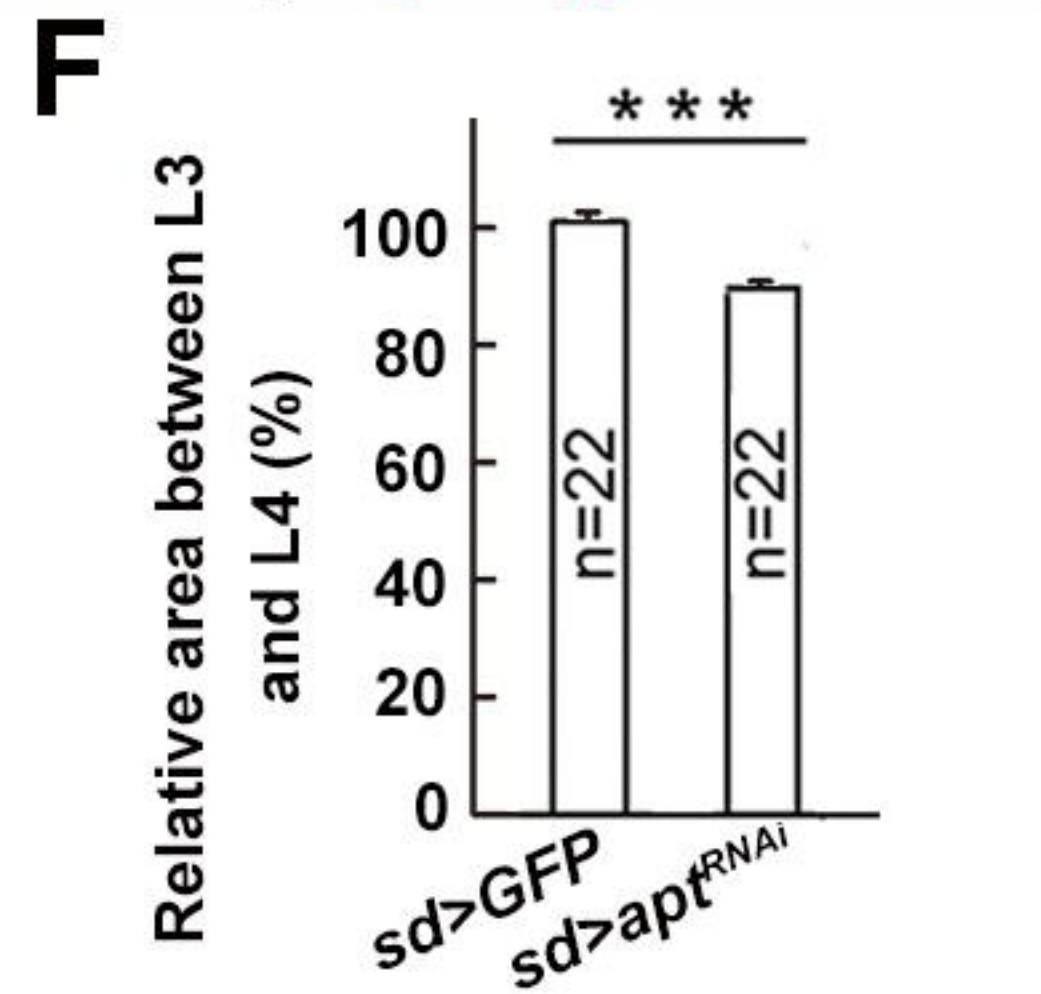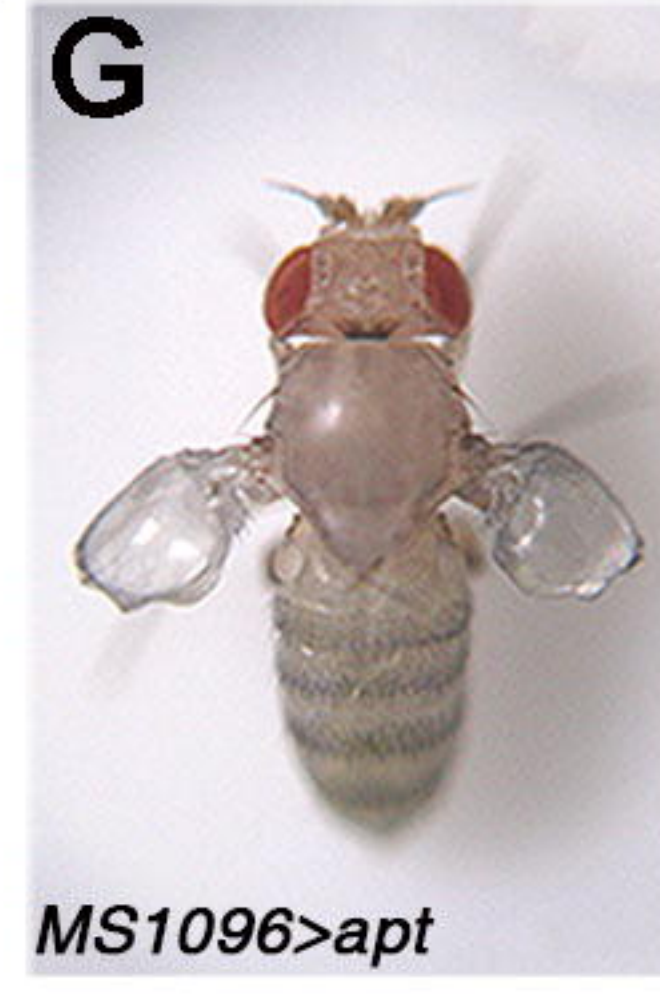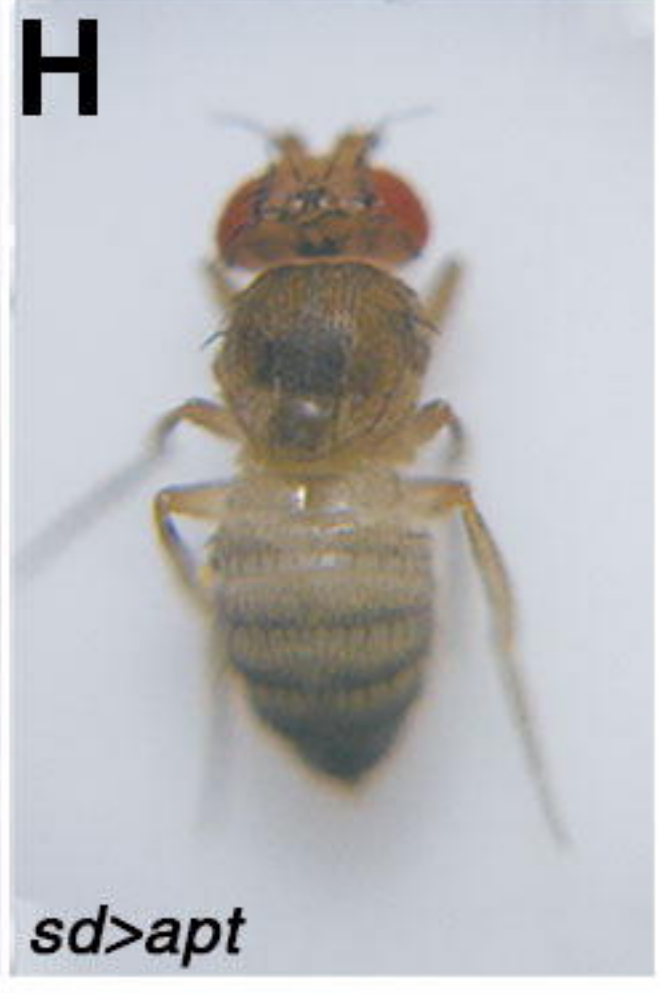

**Figure 1**



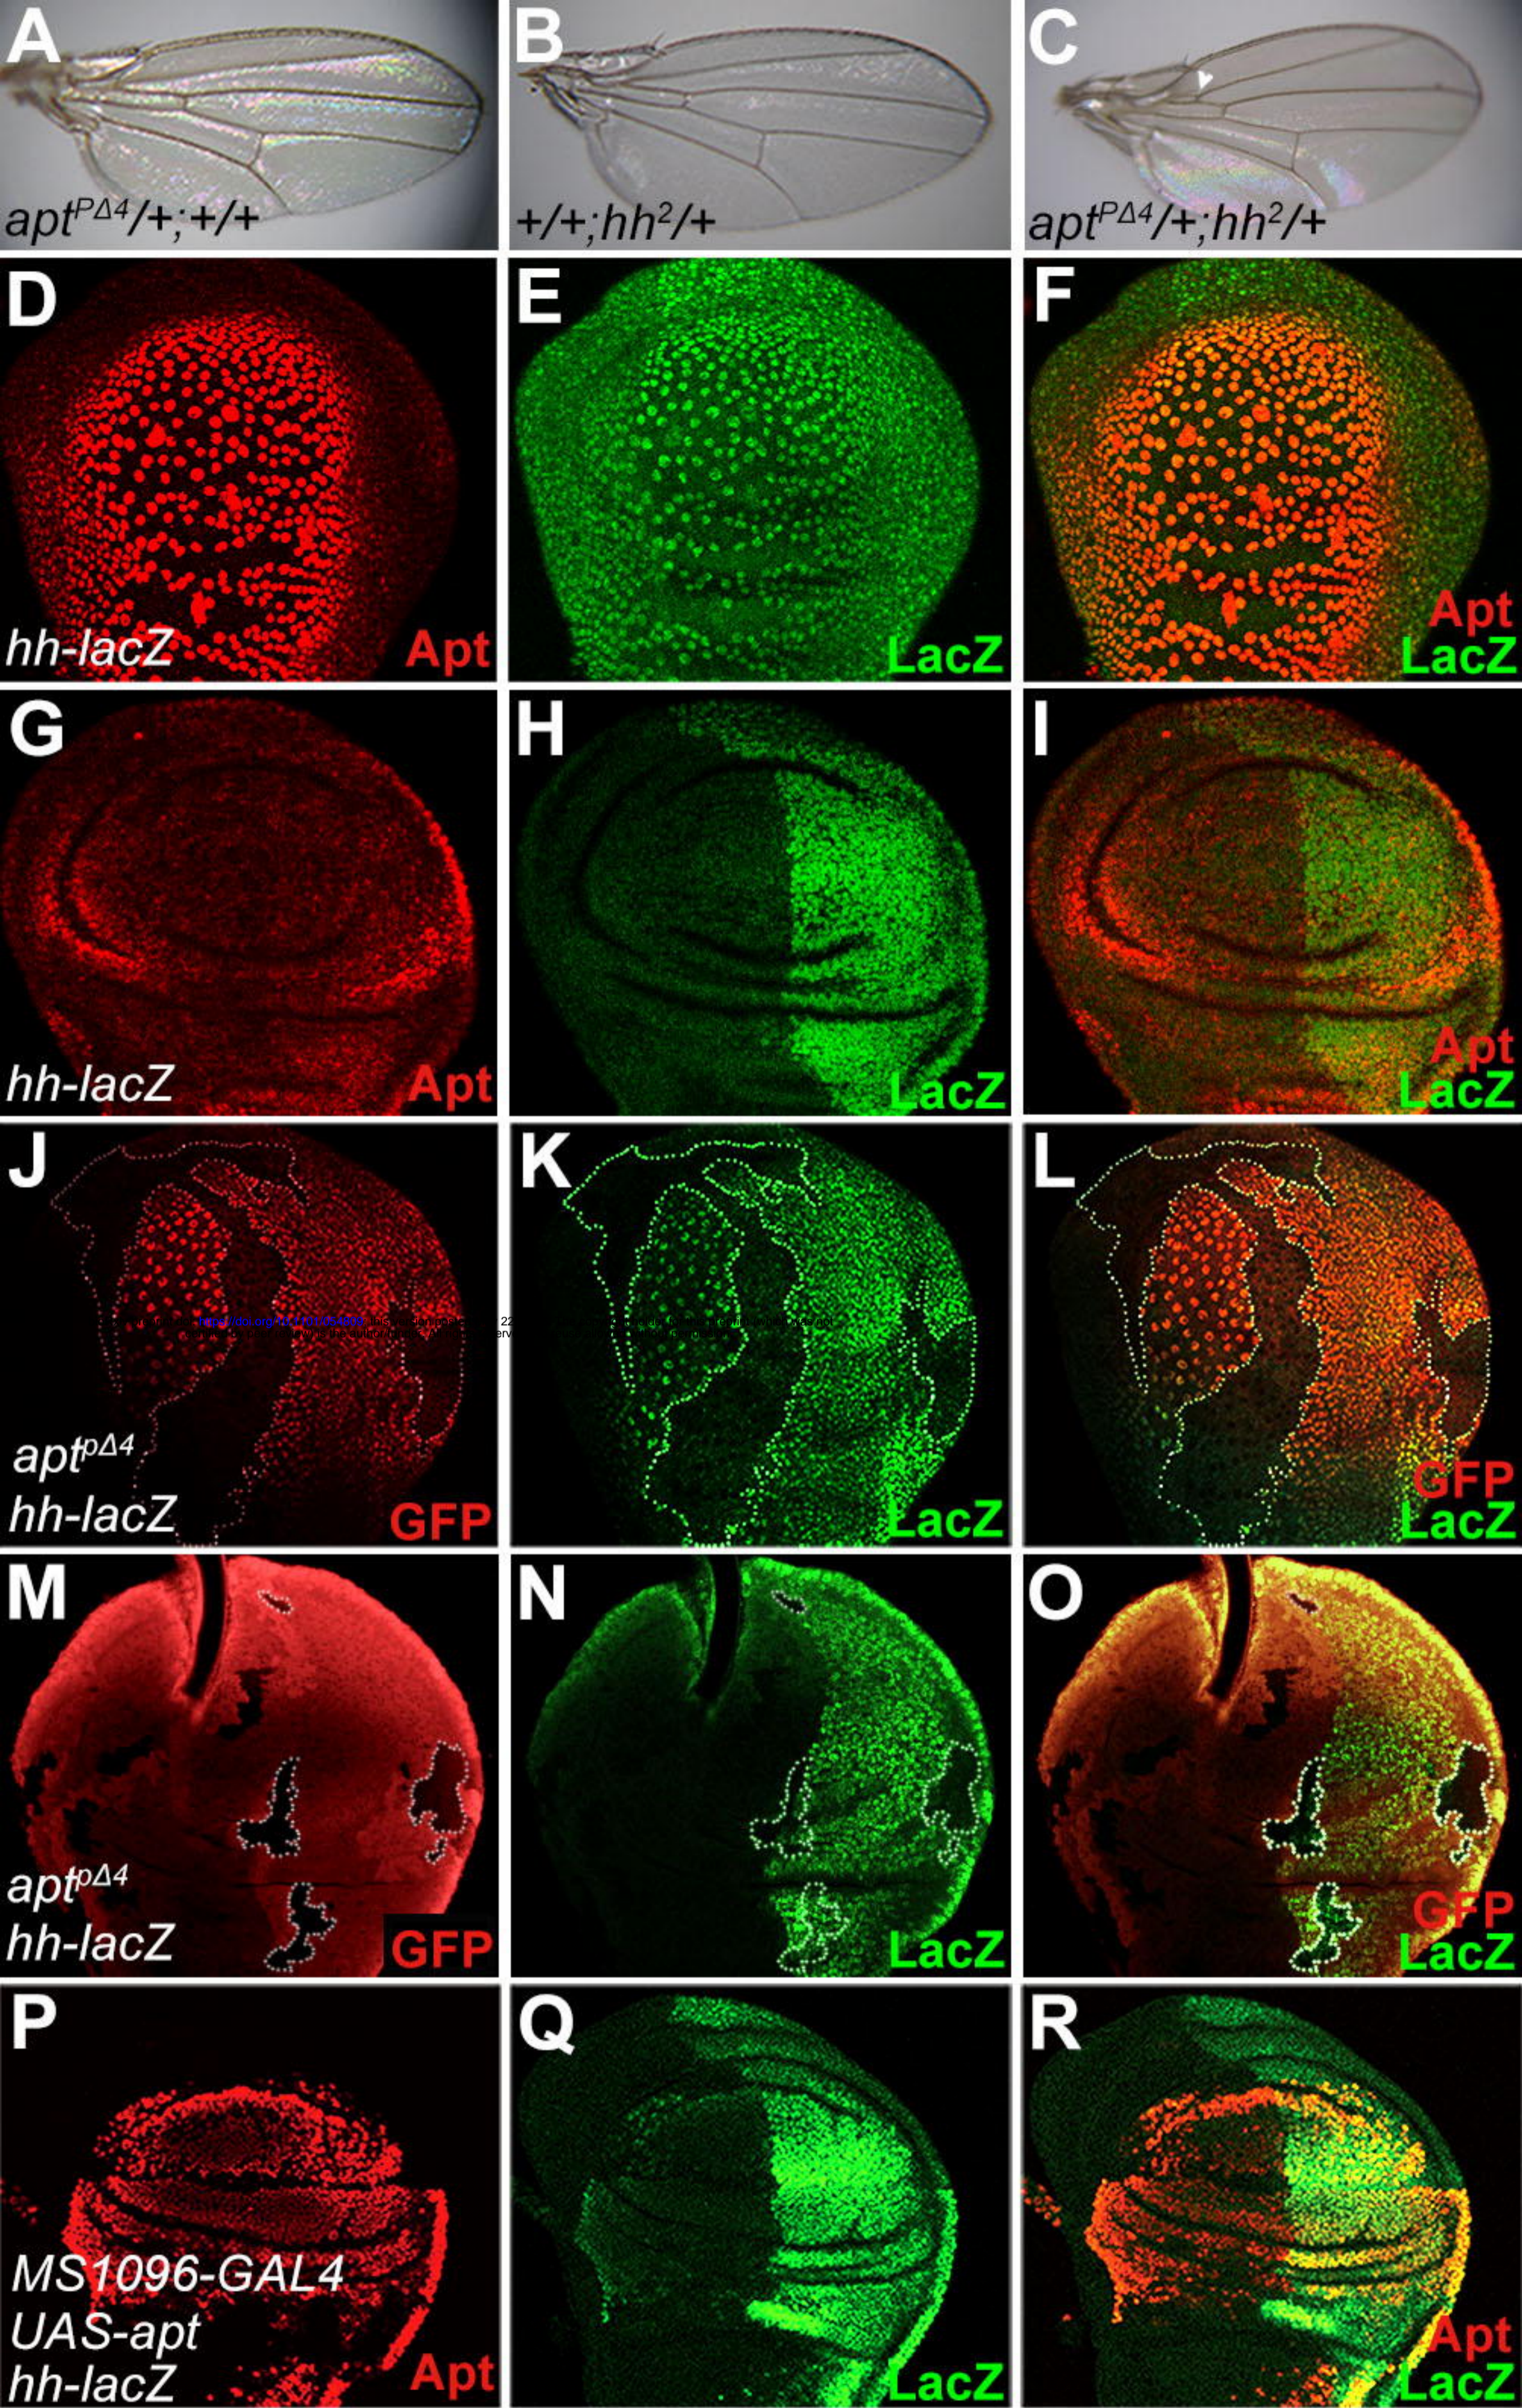

**Figure 2**



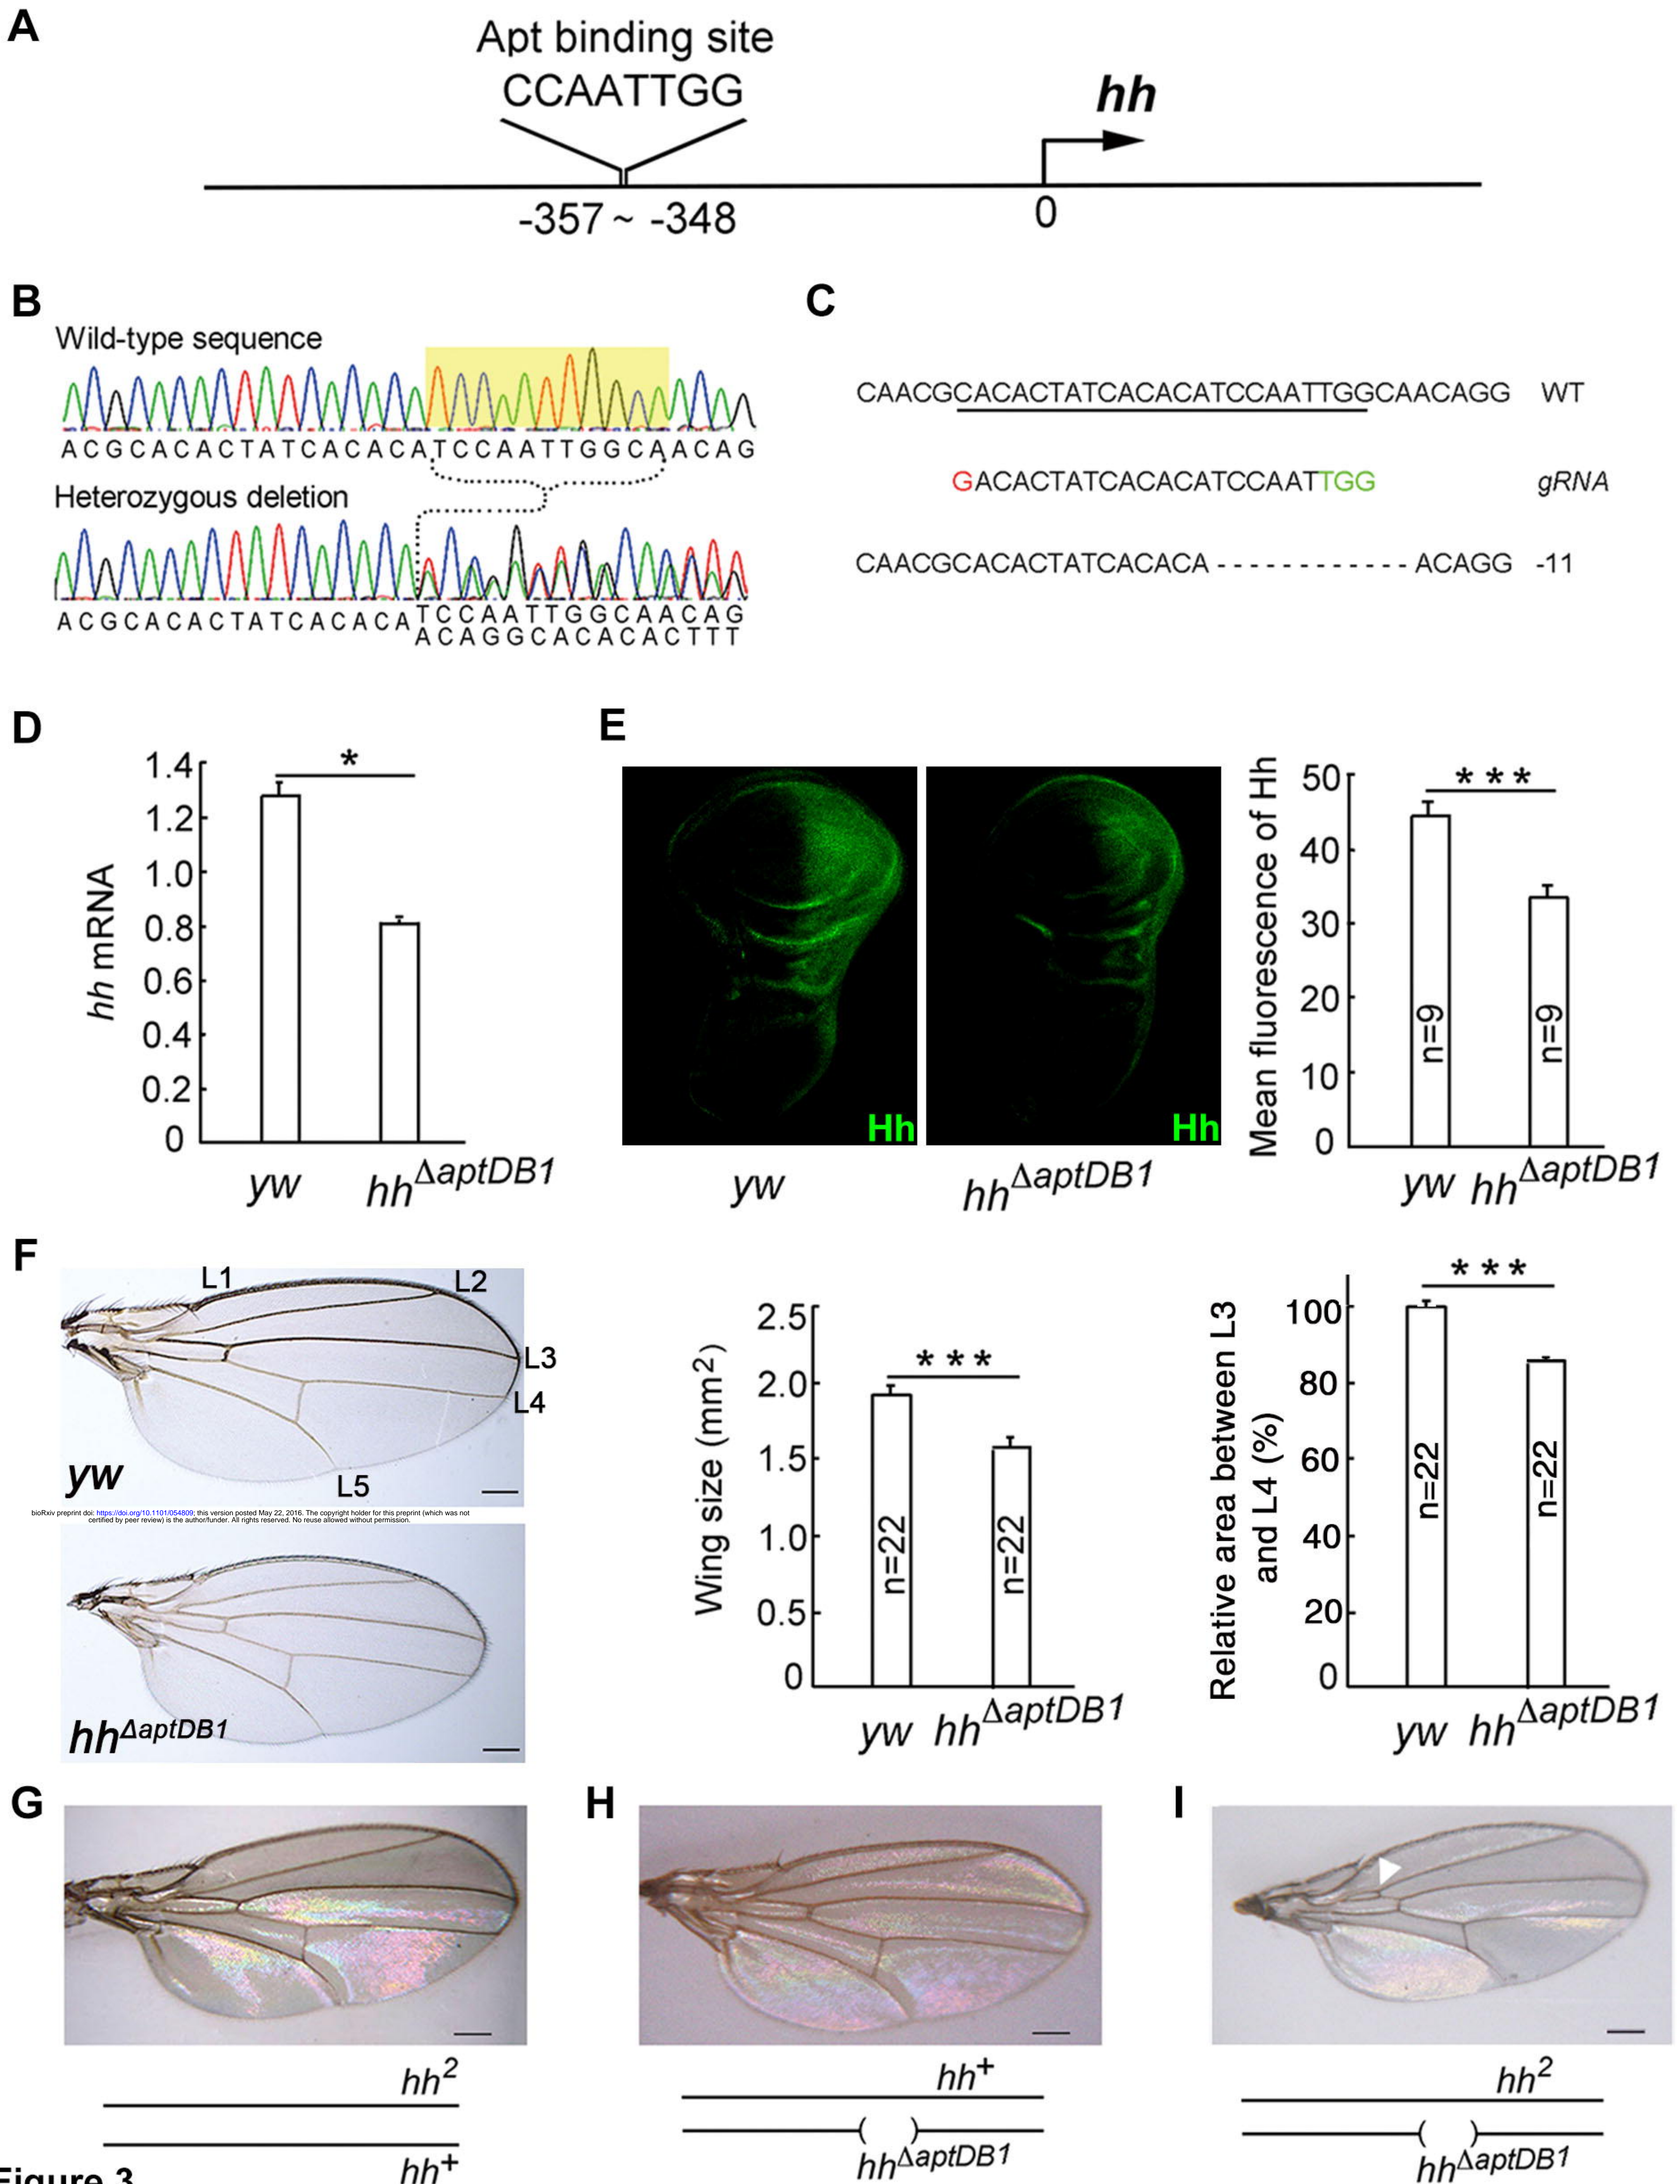

Figure 3



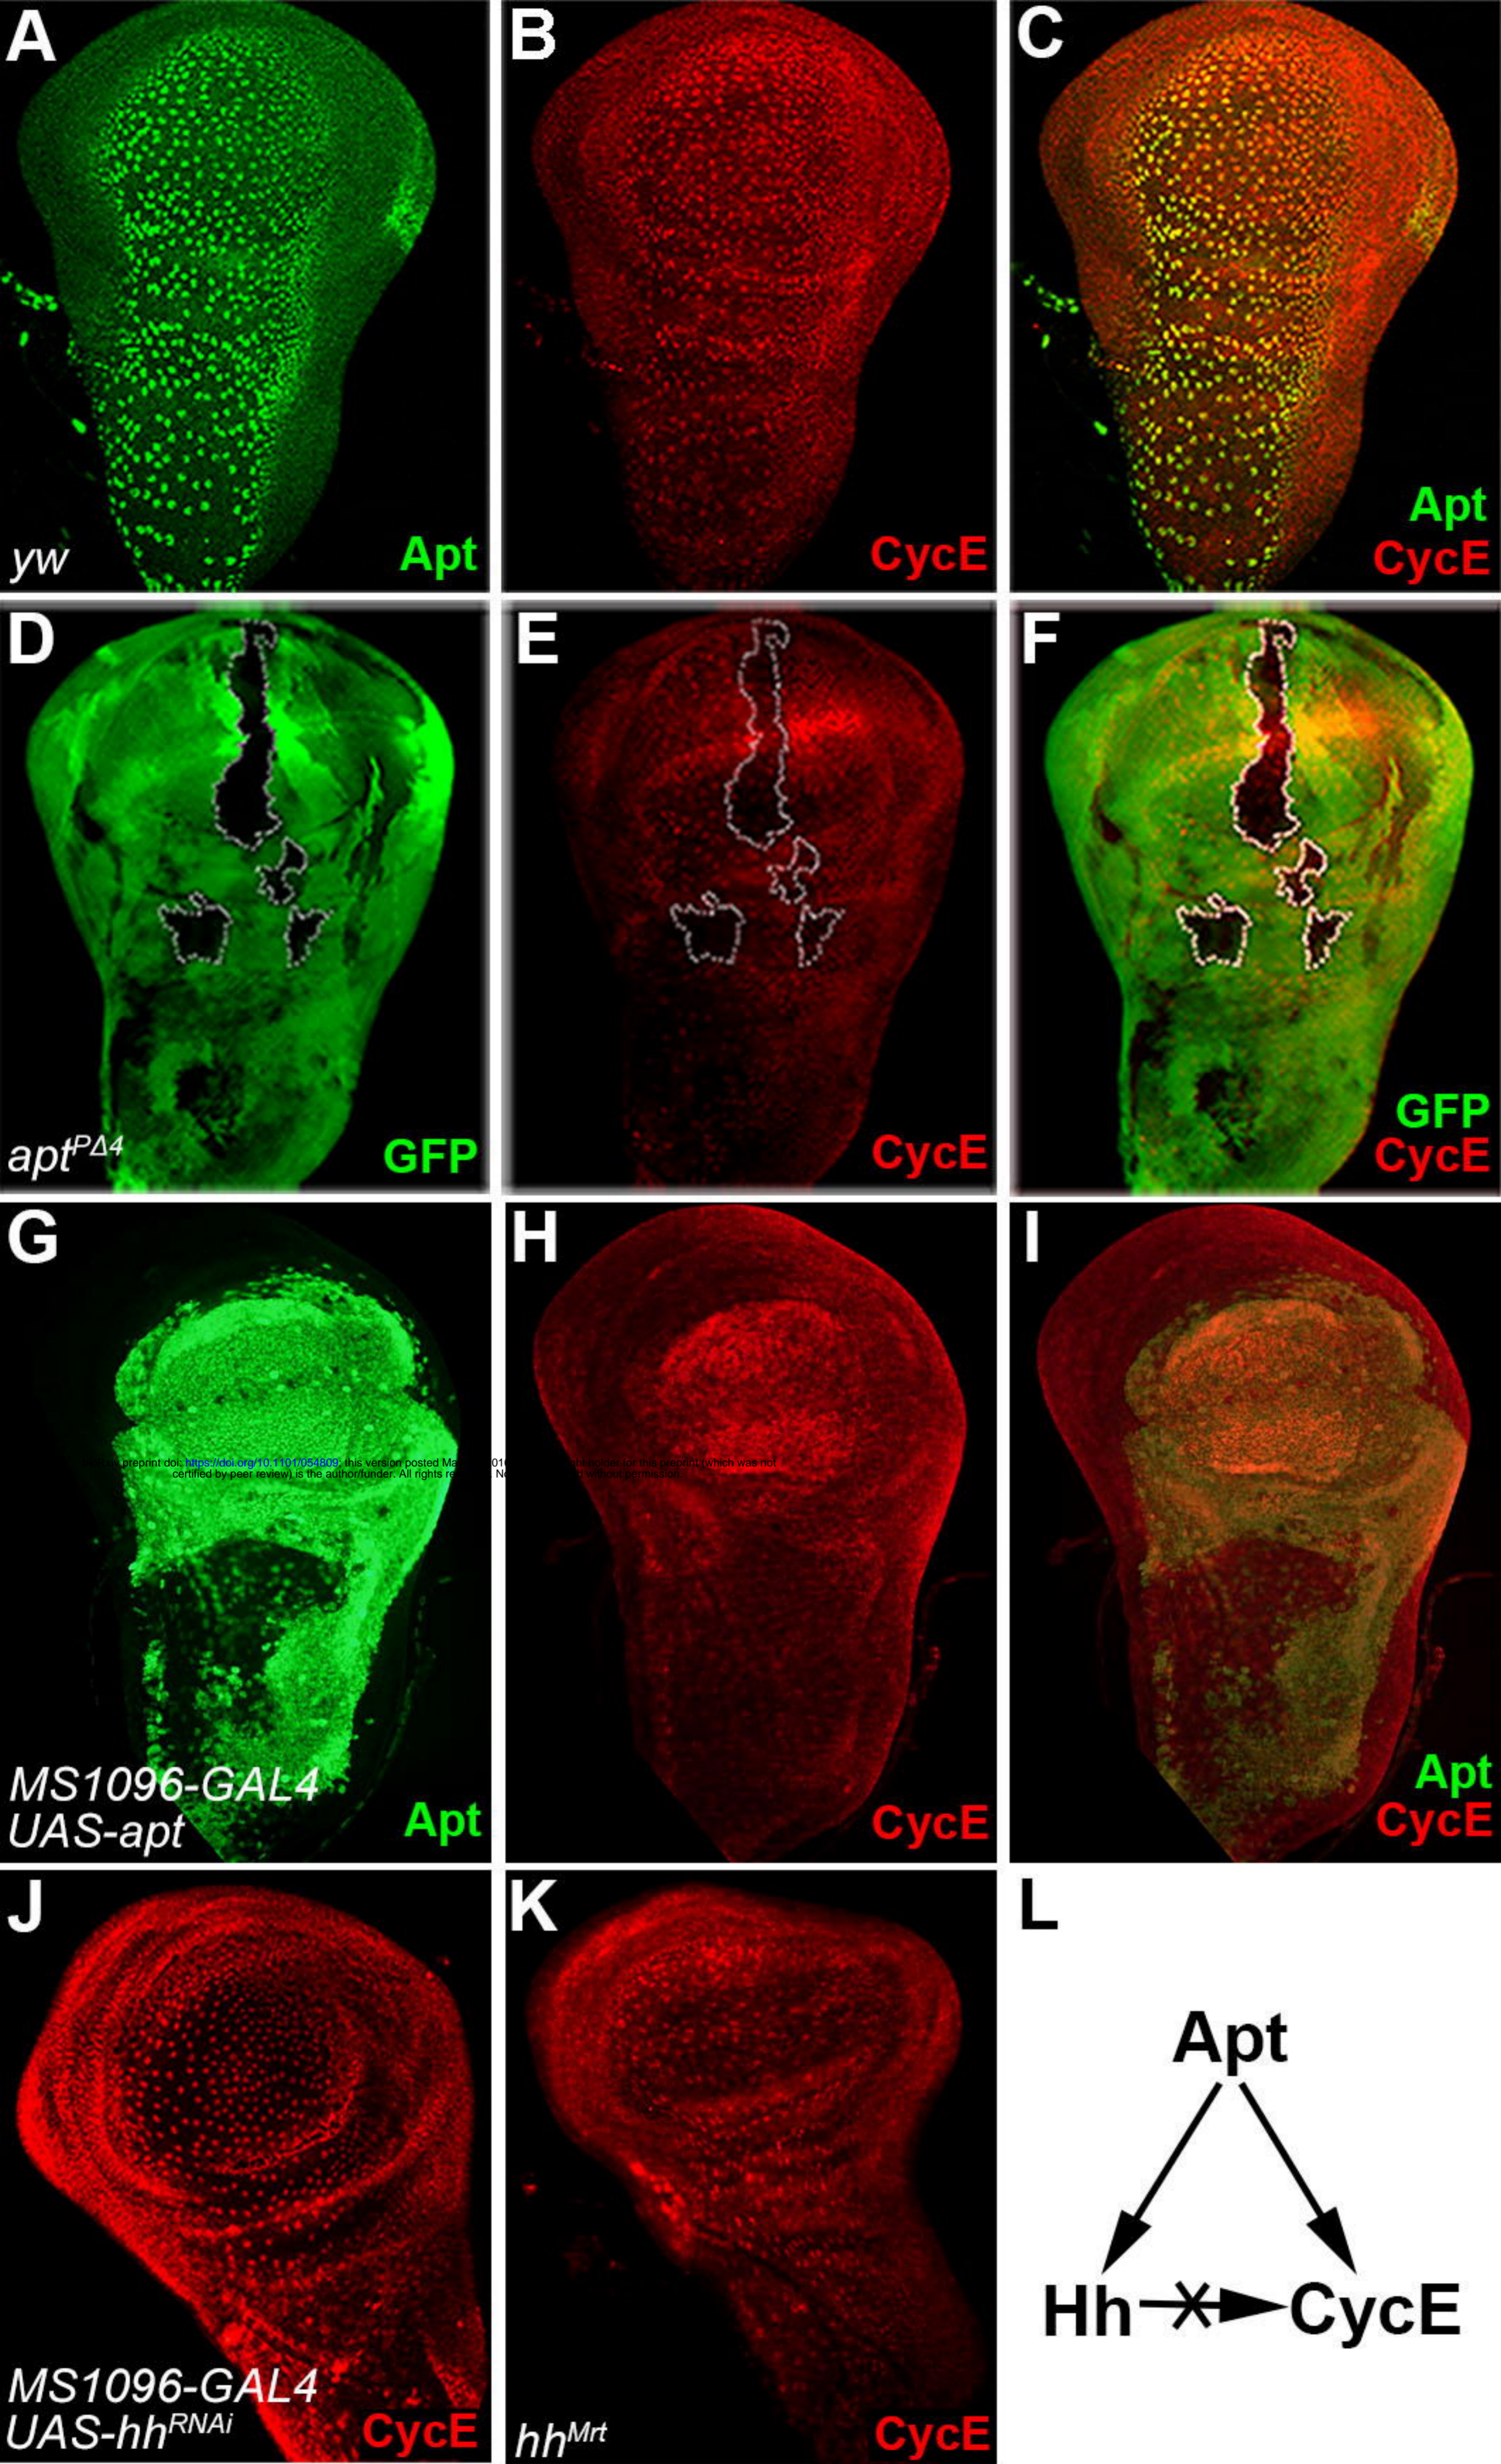

**Figure 4**



**A**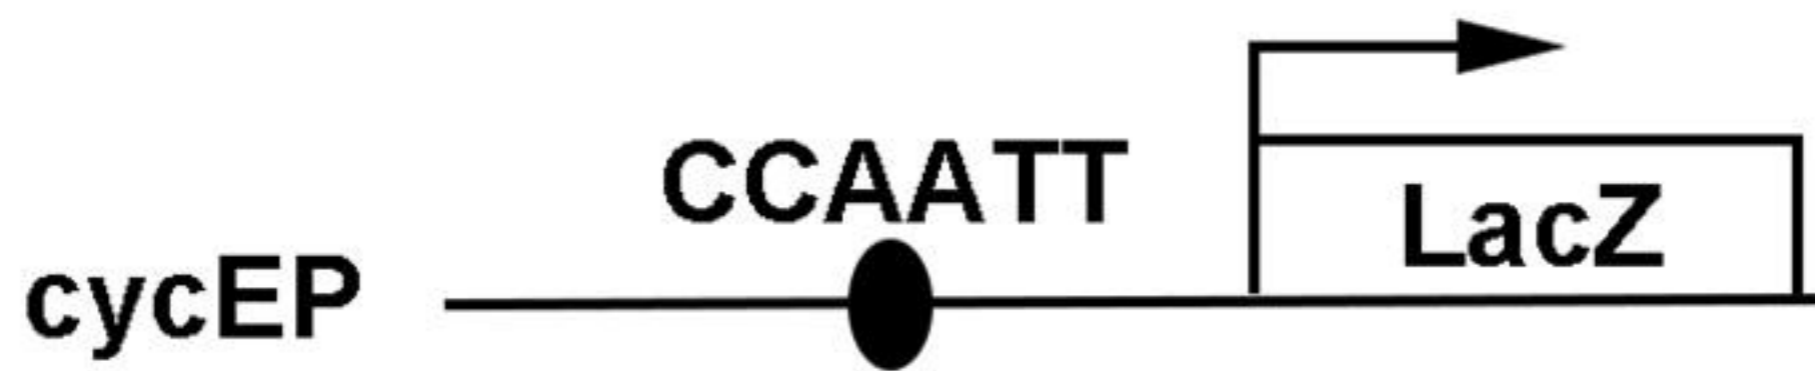**B**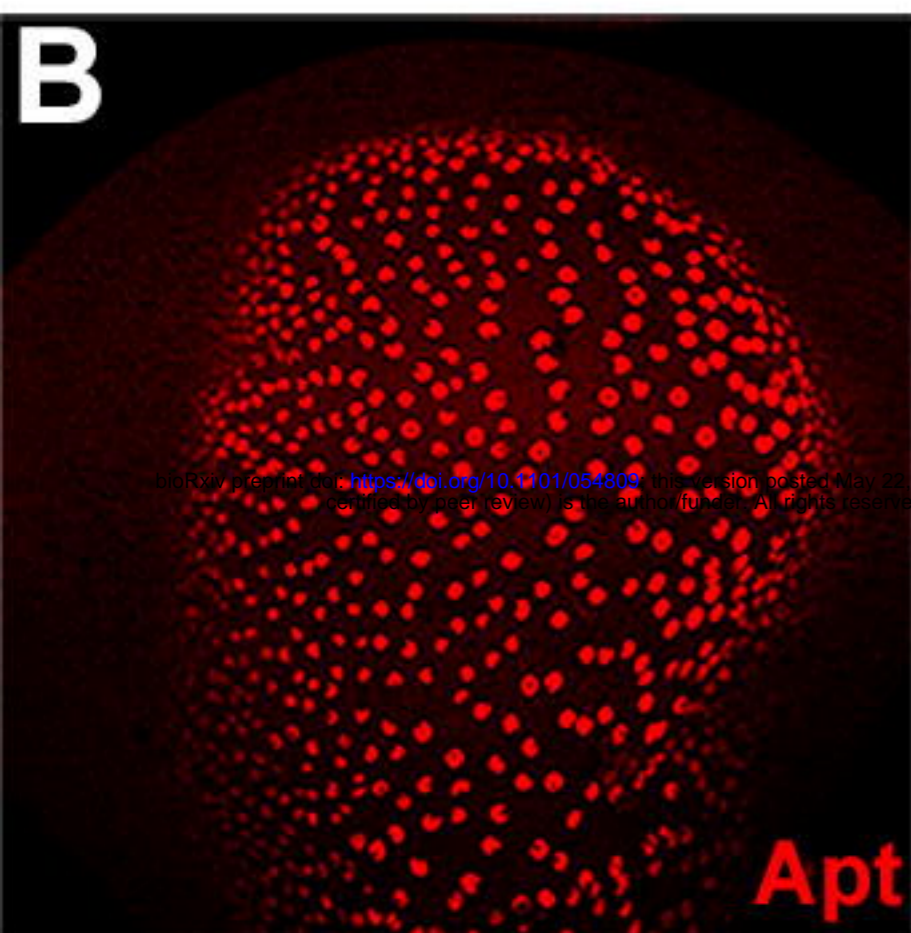**C**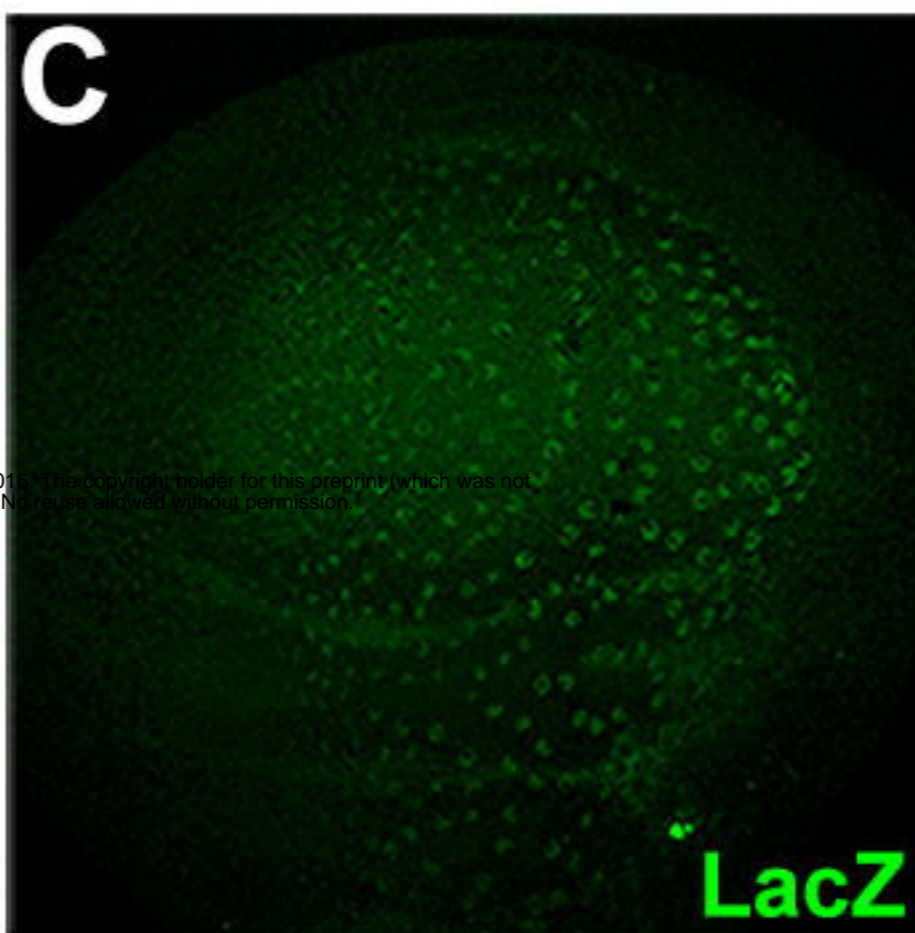**D**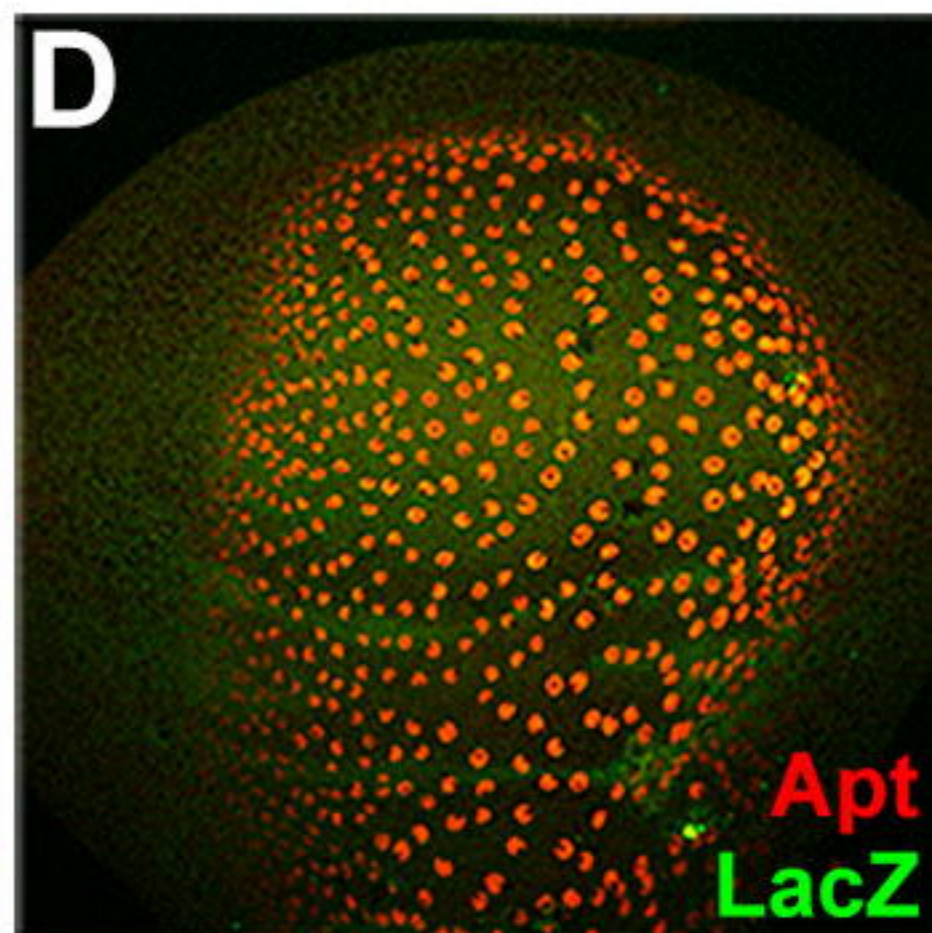**E**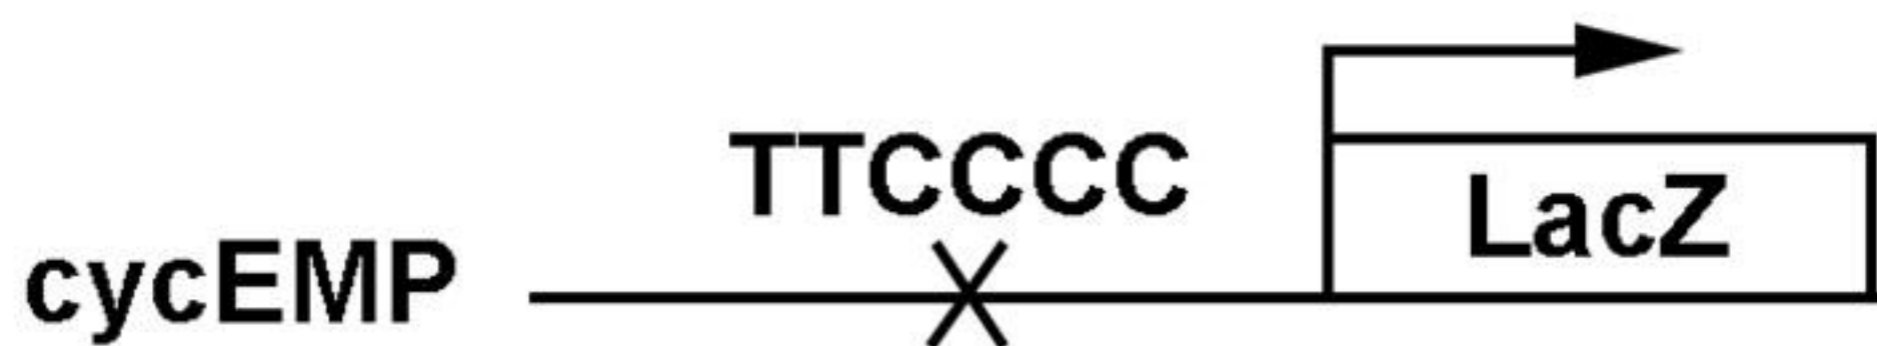**F**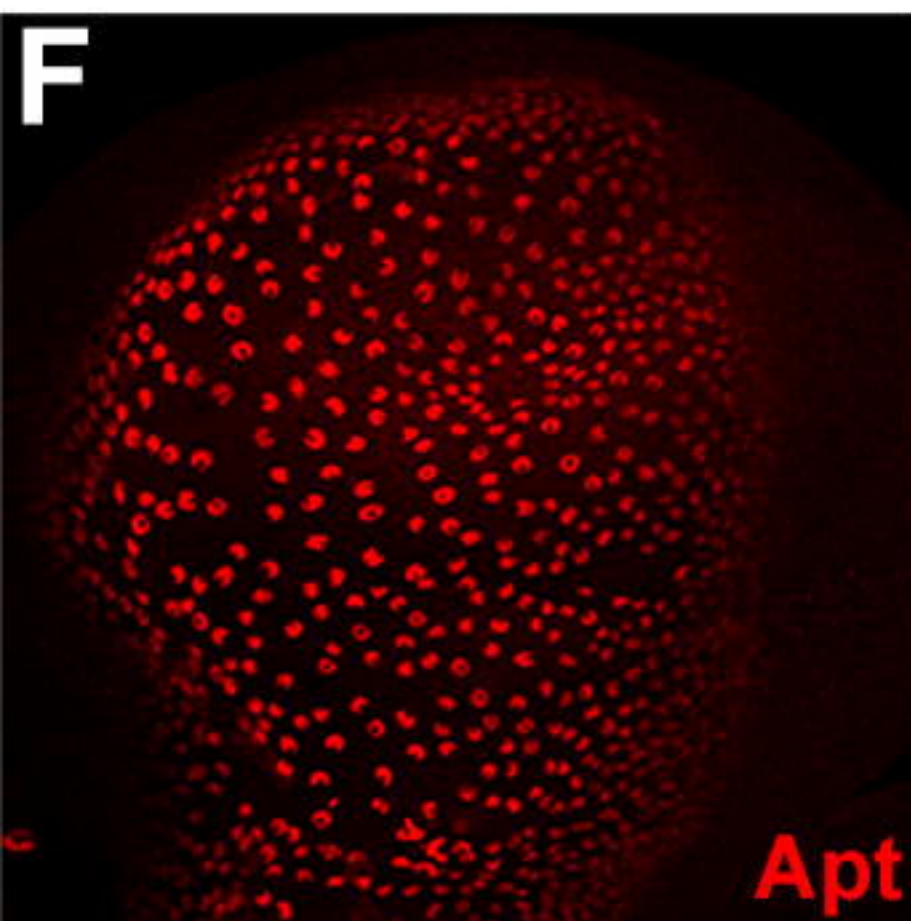**G**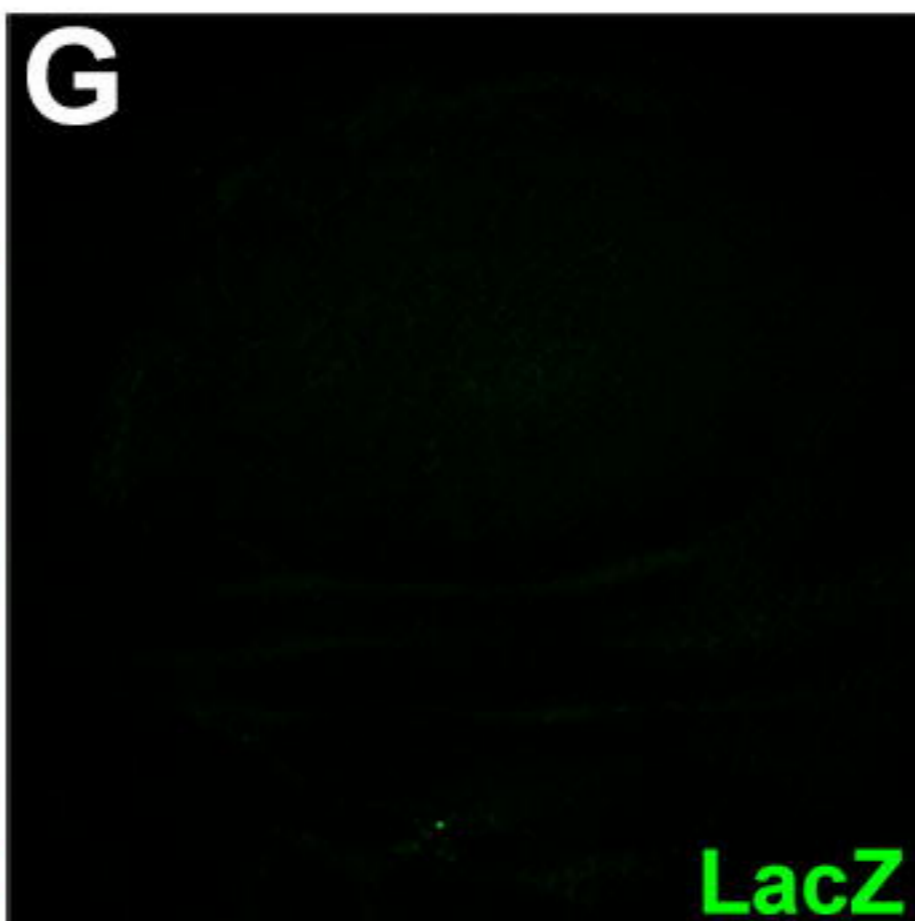**H**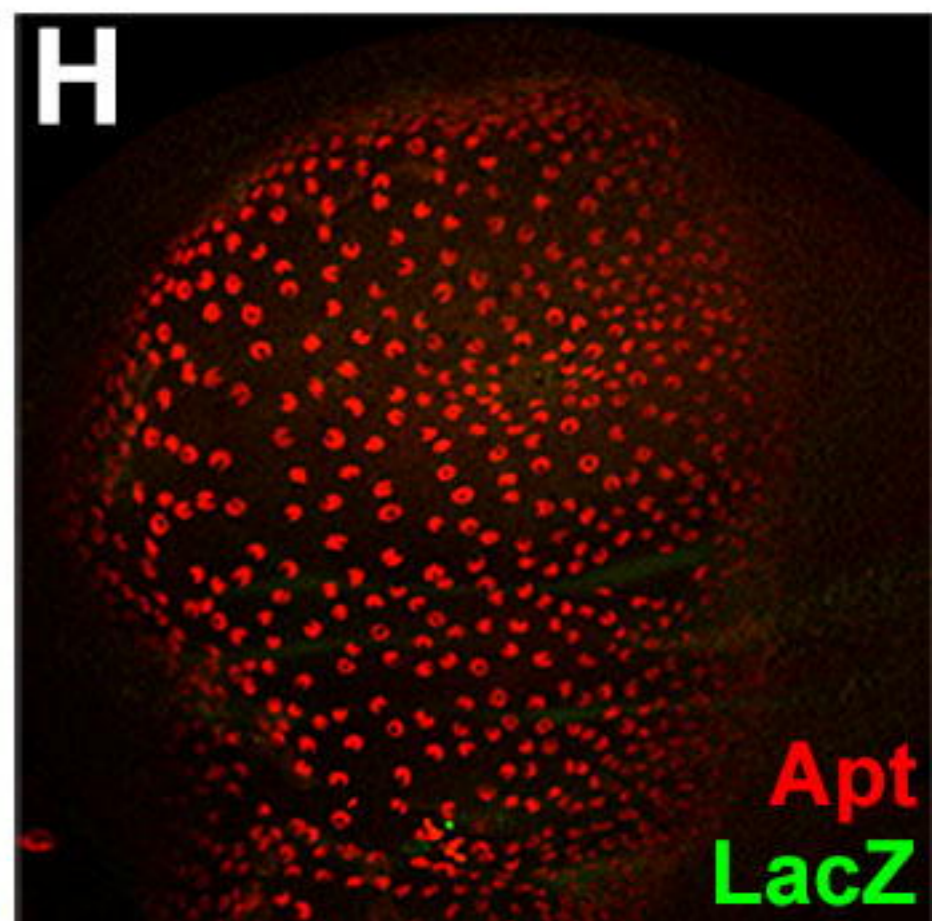

**Figure 5**



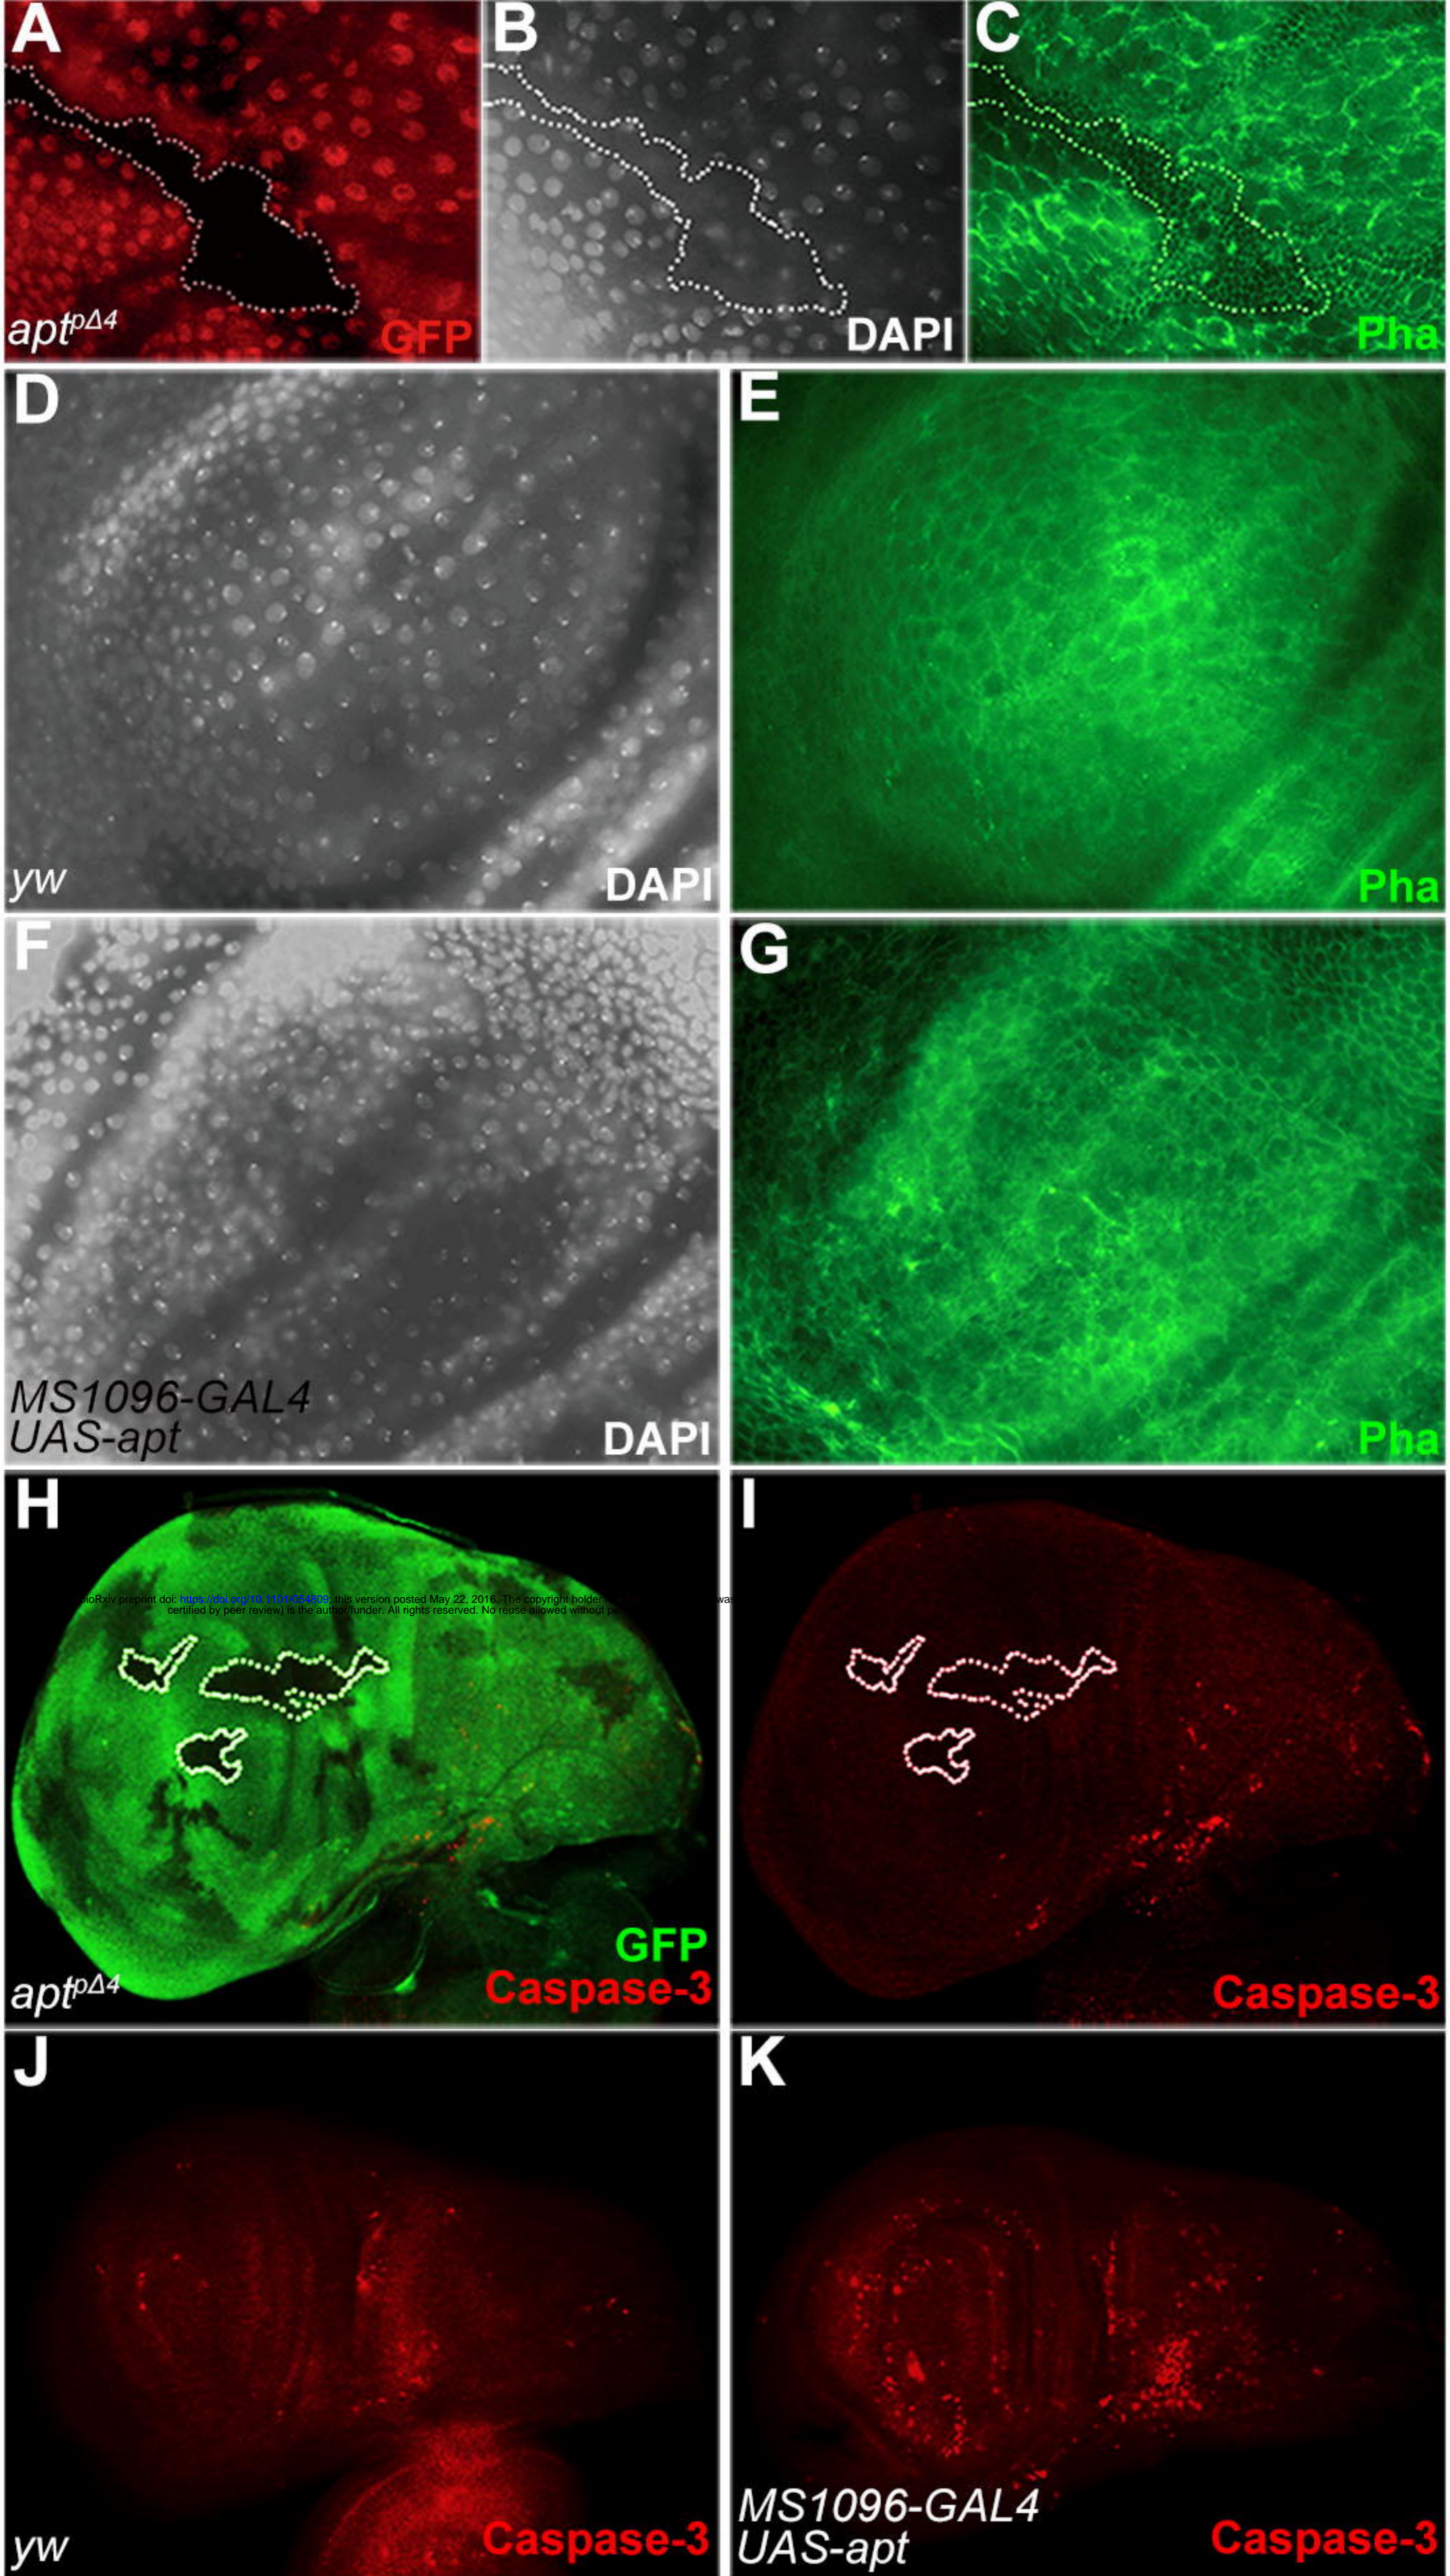

**Figure 6**
